# Supplementary material for: The influence of the polymerization approach on the catalytic performance of novel porous poly (ionic liquid)s for green synthesis of pharmaceutical spiro-4-thiazolidinones
Source: Royal Society of Chemistry journal article supplement (doi:10.1039/d0ra08647a), 2020-01-01
Supplement: d0ra08647a1.pdf [file d0ra08647a1.pdf]

# The influence of polymerization approach on the catalytic performance of novel porous poly (ionic liquid) for green synthesis of pharmaceutical spiro-4-thiazolidinones

Zahra Elyasi<sup>a</sup>, Javad Safaei Ghomi<sup>\*a,b</sup>, Gholam Reza Najafi<sup>a</sup>, Mohammad Reza Zand Monfared<sup>a</sup>

<sup>a</sup> Department of Chemistry, Qom branch, Islamic azad University, Qom, I. R. Iran

<sup>b</sup> Department of Organic Chemistry, Faculty of Chemistry, University of Kashan

\* Corresponding author: +98 31 55912385; fax: +98 31 55552935; \*E-mail: [safaei@kashanu.ac.ir](mailto:safaei@kashanu.ac.ir)

## Table of Contents

|                                                                                                                                |        |
|--------------------------------------------------------------------------------------------------------------------------------|--------|
| <b>Part 1.</b> Characterization of ionic monomer                                                                               | S2     |
| <b>Part 2.</b> Characterization of fabricated PIL:                                                                             |        |
| EDX analysis and elemental mapping images                                                                                      | S3     |
| VSM analysis                                                                                                                   | S4     |
| <b>Part 3.</b> Characterization of spiro-4-thiazolidinones: <sup>1</sup> H NMR, <sup>13</sup> C NMR,<br>and elemental analysis | S5-S32 |

## Part 1. Characterization of ionic monomer

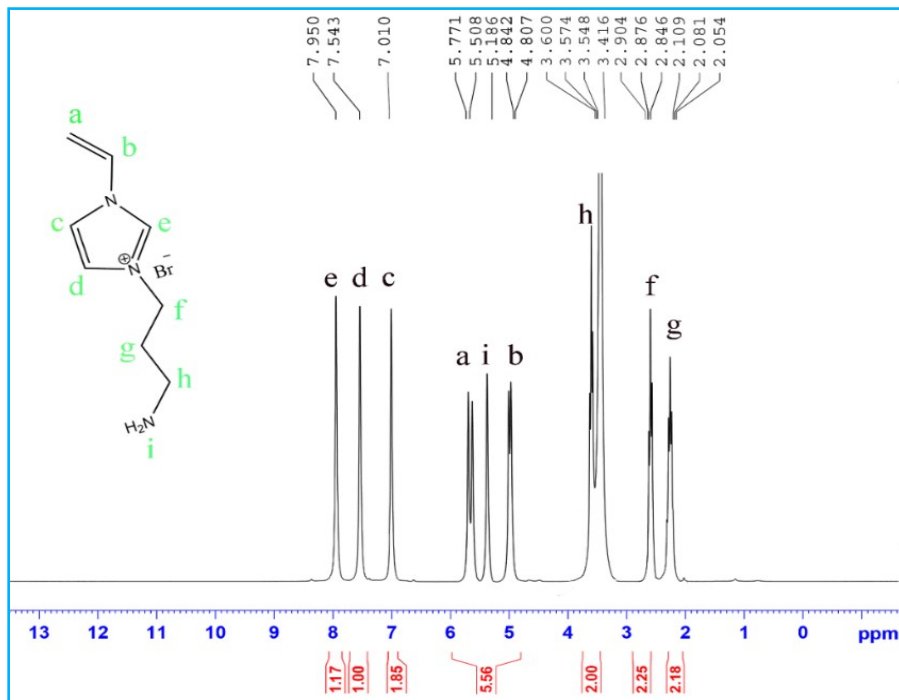

Figure S1. <sup>1</sup>H NMR spectra of ionic monomer

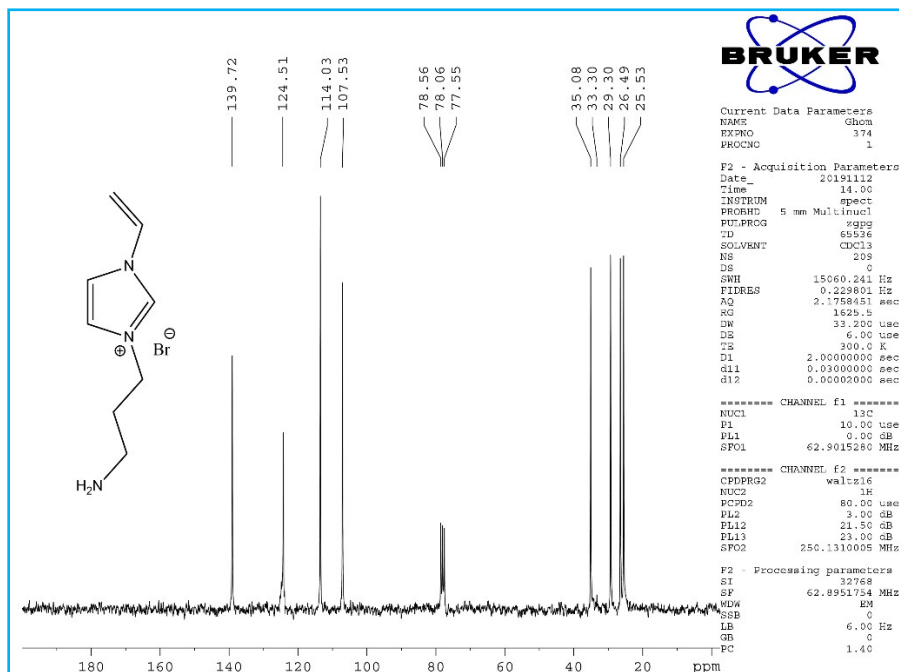

Figure S2. <sup>13</sup>C NMR spectra of ionic monomer

## Part 2. EDX analysis and elemental mapping images

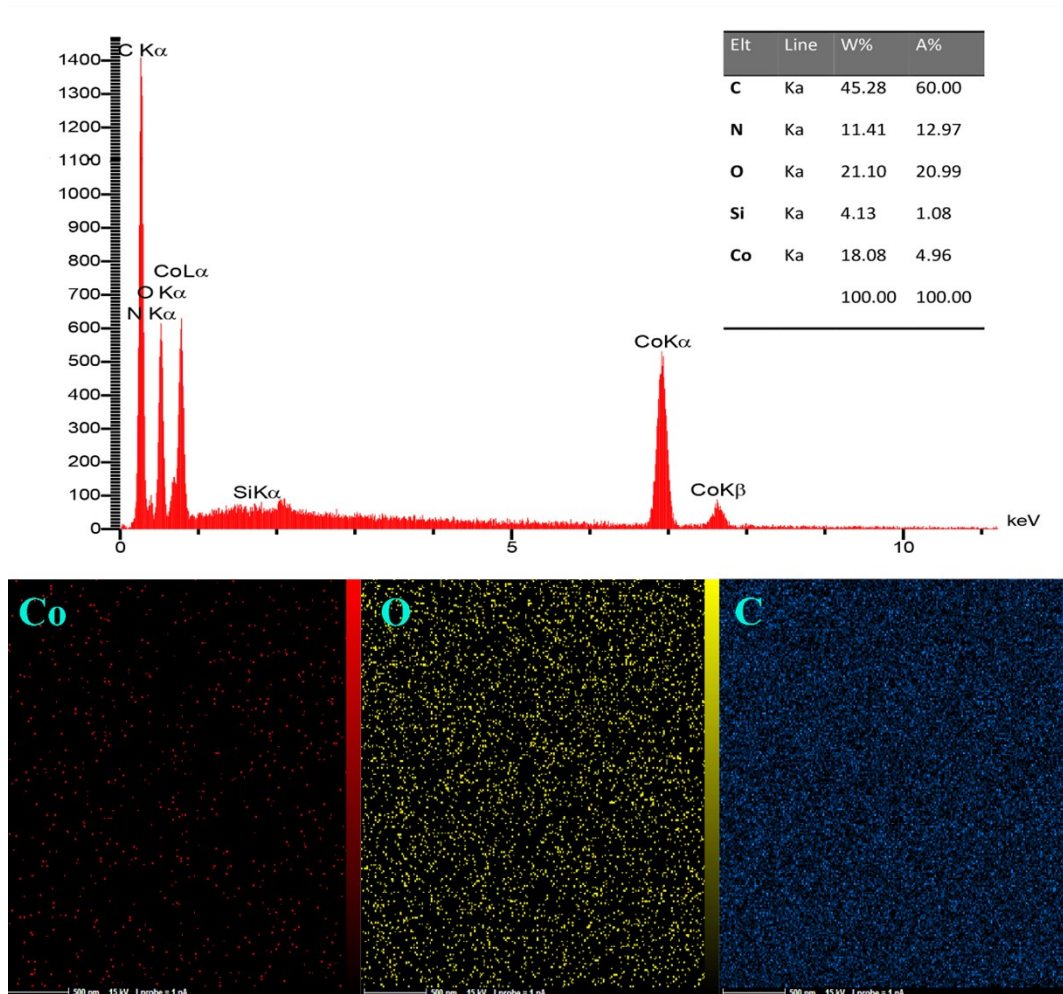

**Part 2. VSM analysis**

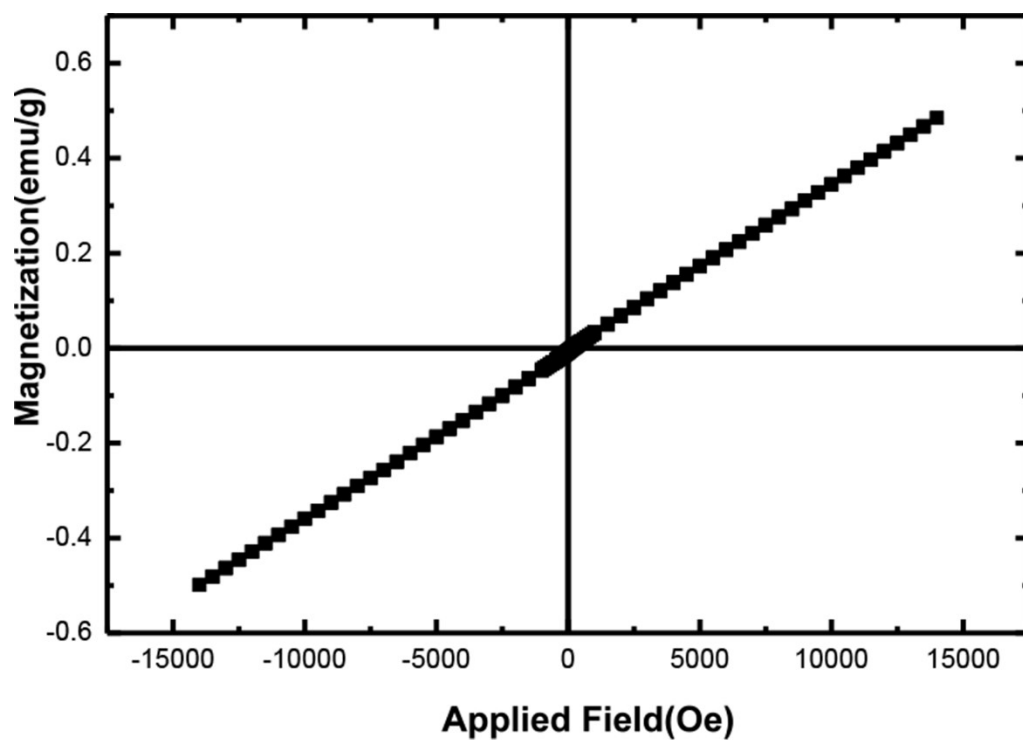

**Figure S4.** VSM curve of sonocatalyst

### Part 3. Characterization of spiro-4-thiazolidinones

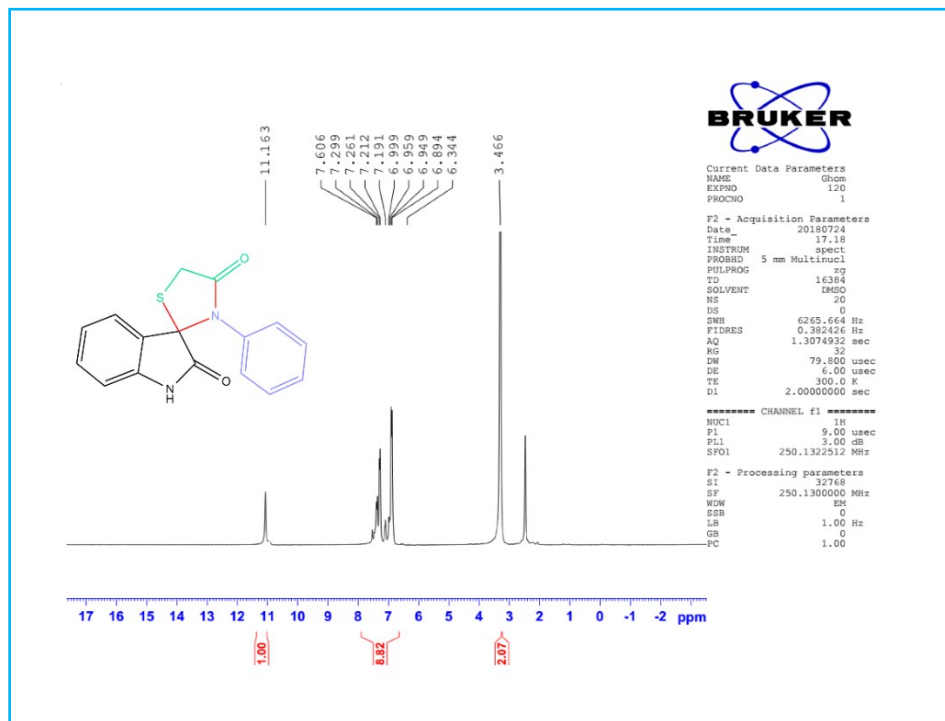

Figure S5. <sup>1</sup>H NMR spectrum of 3'-Phenyl-spiro[3H-indole-3,2'-thiazolidine]-2,4'(1H)-dione (**4a**)

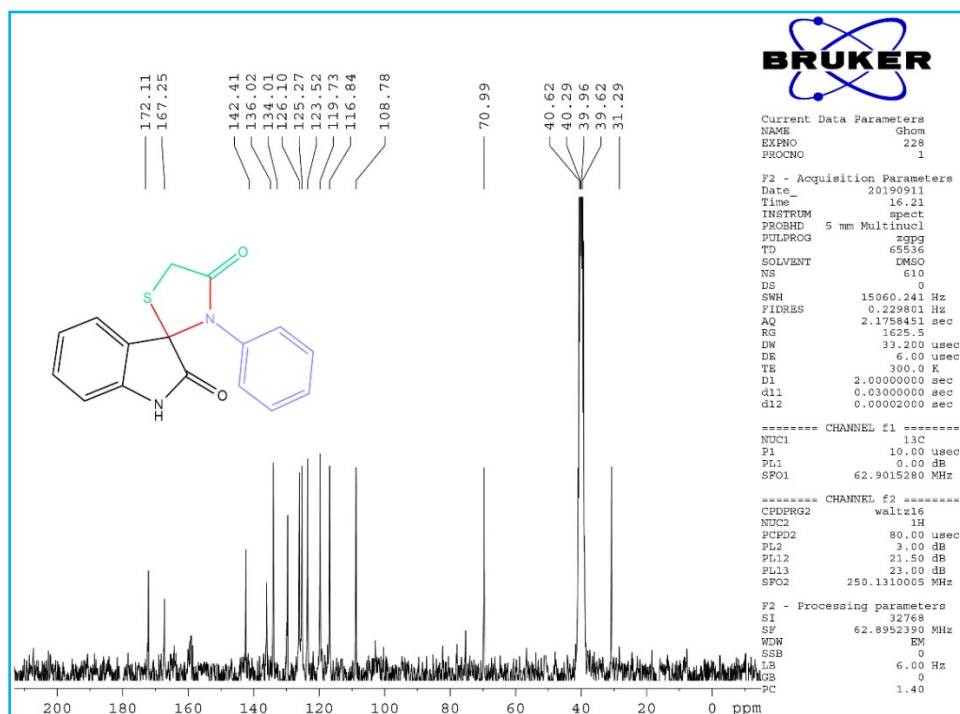

Figure S6. <sup>13</sup>C NMR spectrum of 3'-Phenyl-spiro[3H-indole-3,2'-thiazolidine]-2,4'(1H)-dione (**4a**)

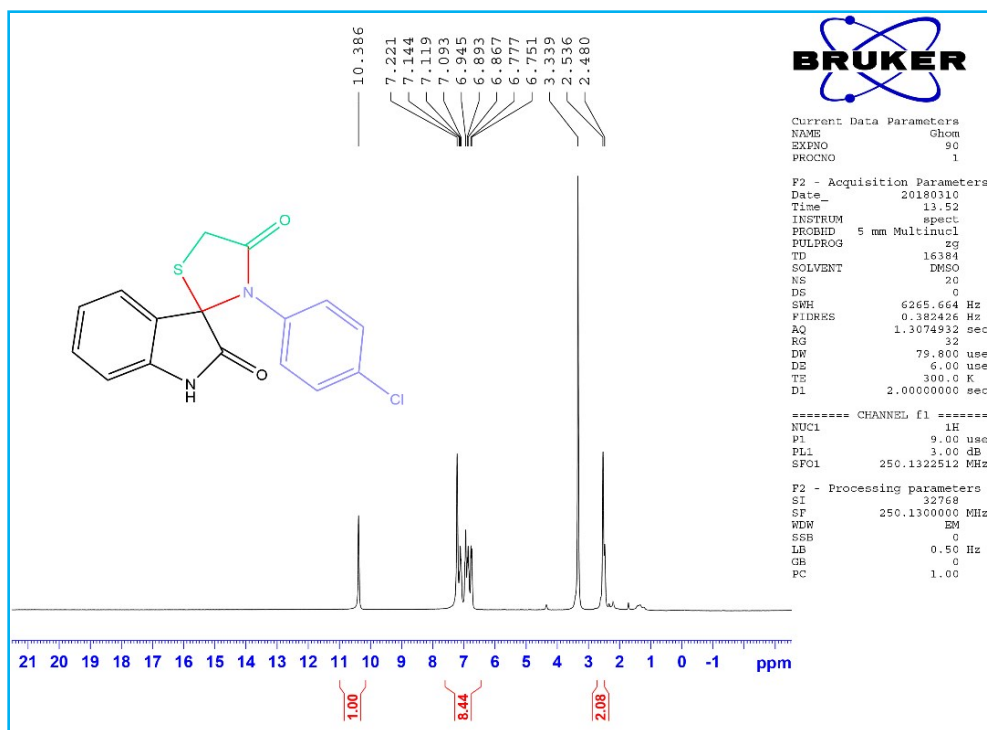

Figure S7. <sup>1</sup>H NMR spectrum of 3'-(4-Chlorophenyl)-spiro[3H-indole-3,2'-thiazolidine]-2,4'(1H)-dione (4b)

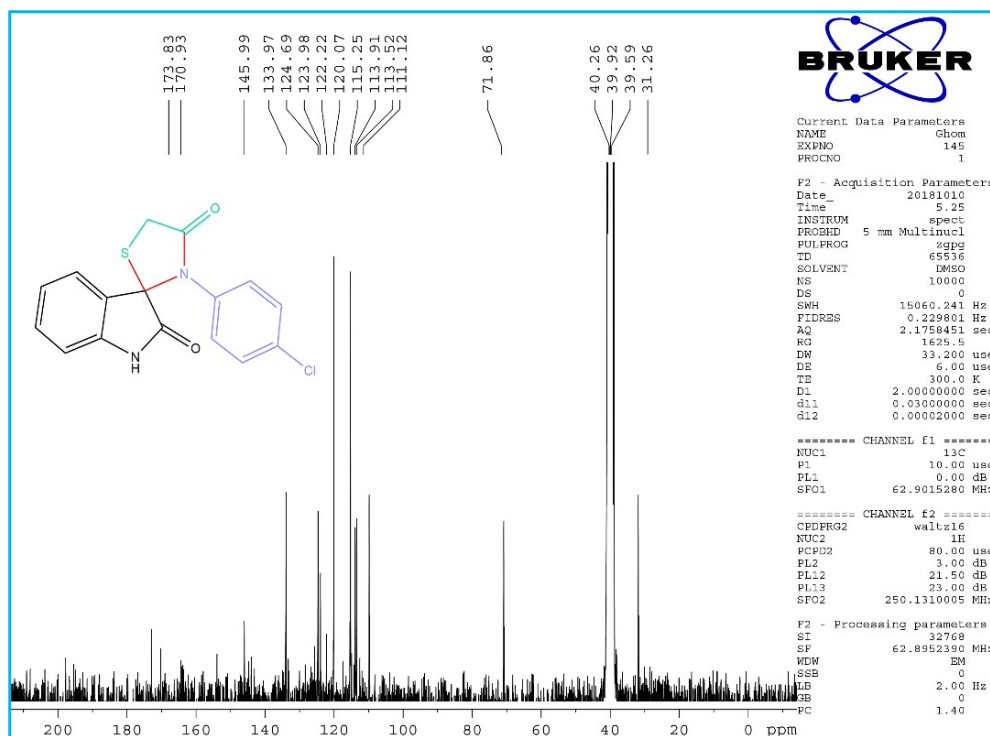

Figure S8. <sup>13</sup>C NMR spectrum of 3'-(4-Chlorophenyl)-spiro[3H-indole-3,2'-thiazolidine]-2,4'(1H)-dione (4b)

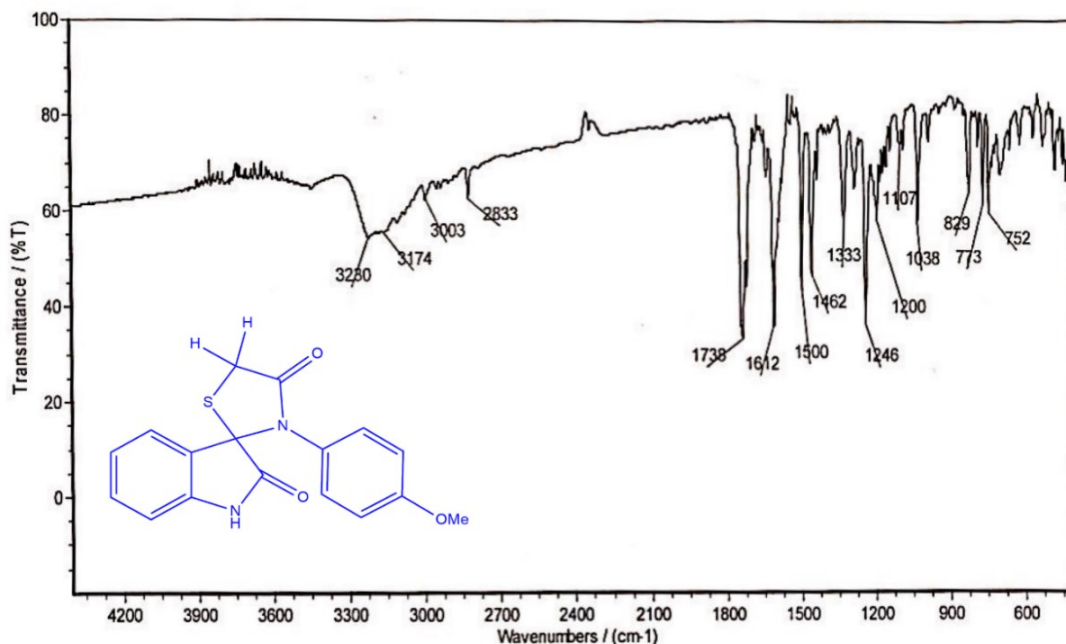

New compound, Figure S9: FT-IR (KBr) spectrum of 3'-(4-Methoxyphenyl)-spiro[3H-indole-3,2'-thiazolidine]-2,4'(1H)-dione (**4c**)

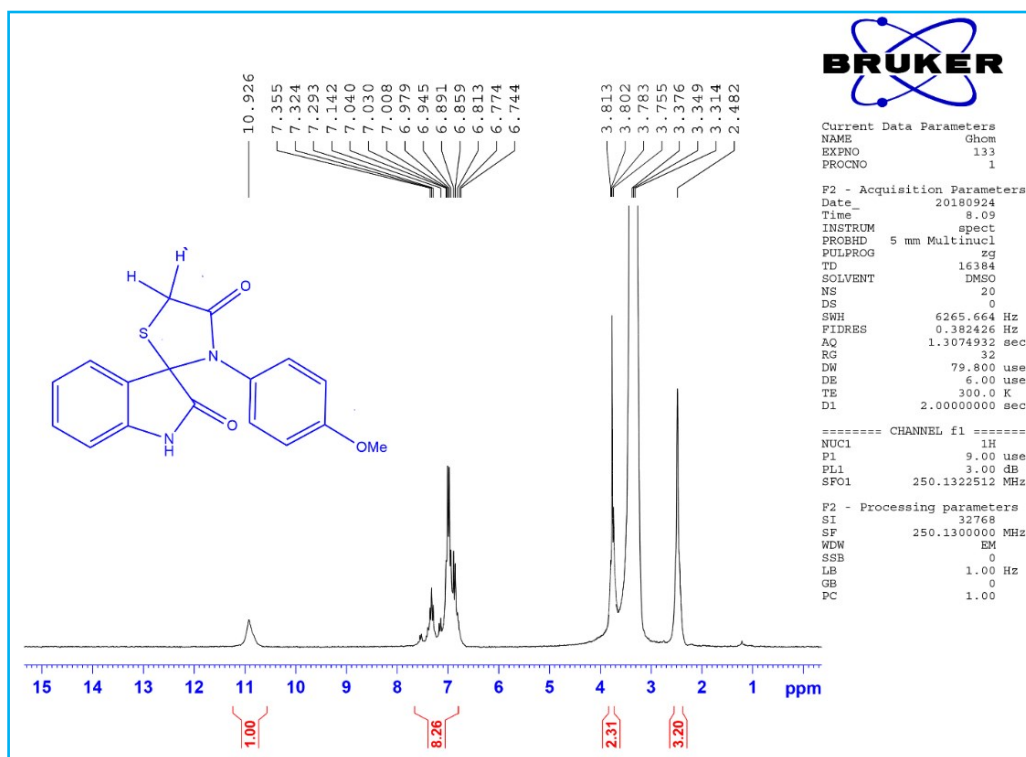

New compound, Figure S10: <sup>1</sup>H NMR spectrum of 3'-(4-Methoxyphenyl)-spiro[3H-indole-3,2'-thiazolidine]-2,4'(1H)-dione (**4c**)

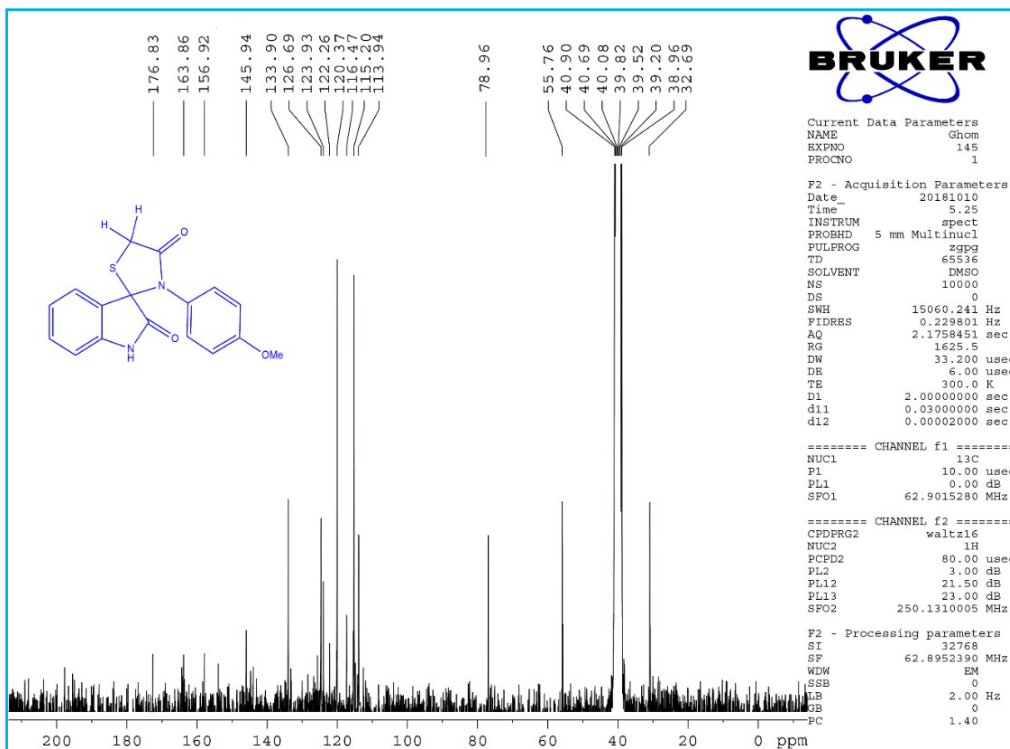

New compound, **Figure S11**:  $^{13}\text{C}$  NMR spectrum of 3'-(4-Methoxyphenyl)-spiro[3H-indole-3,2'-thiazolidine]-2,4'(1H)-dione (**4c**)



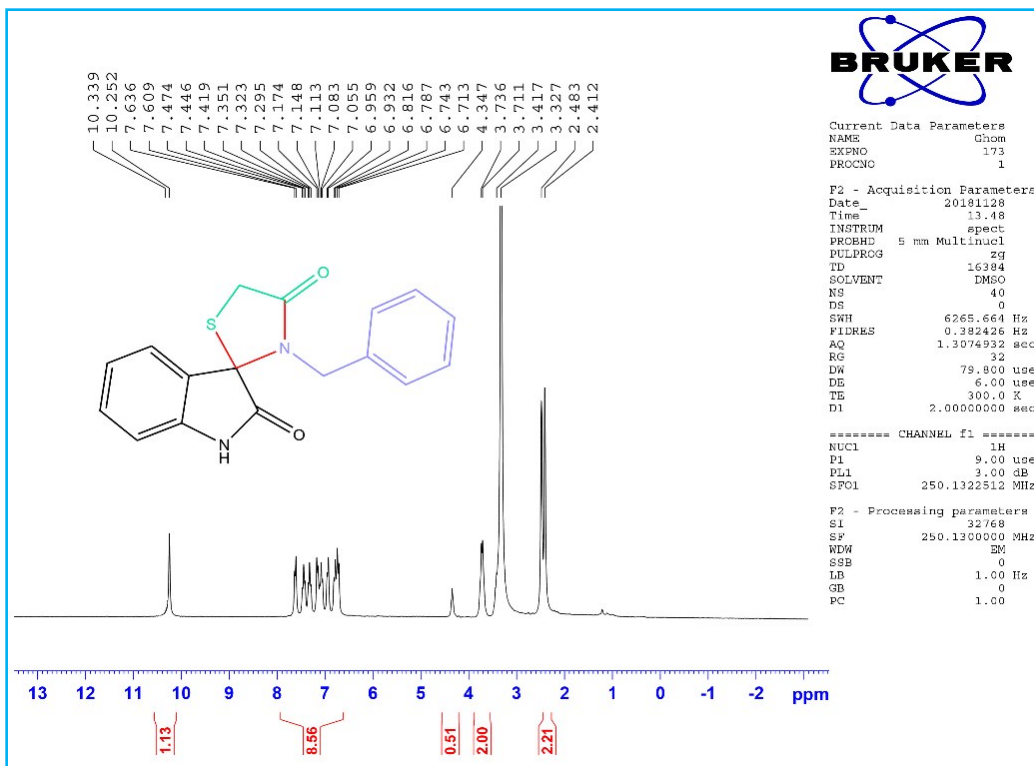

Figure S12:  $^1\text{H}$  NMR spectrum of 3'-Benzyl-spiro[indoline-3,2'-thiazolidine]-2,4'-dione (**4d**)

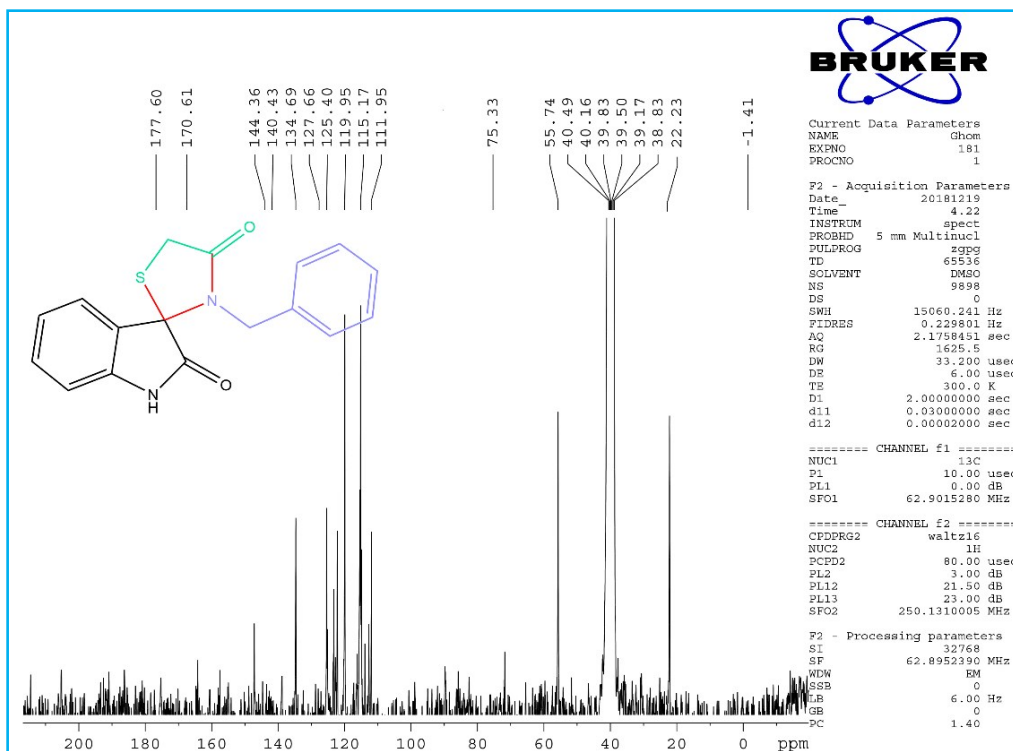

Figure S13:  $^{13}\text{C}$  NMR spectrum of 3'-Benzyl-spiro[indoline-3,2'-thiazolidine]-2,4'-dione (**4d**)

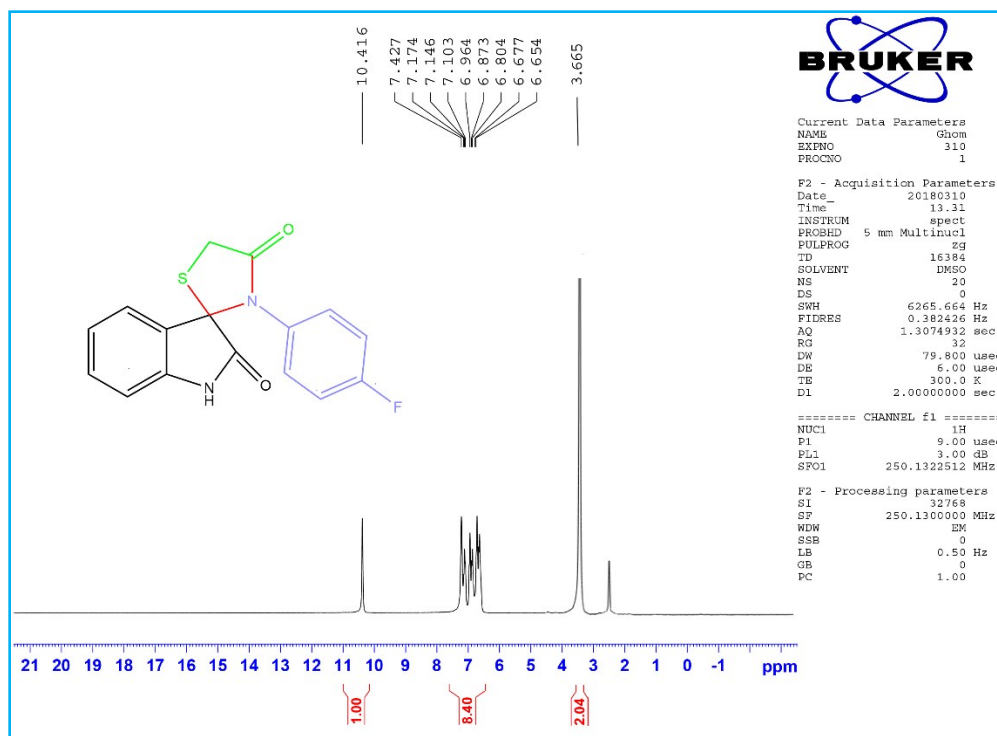

**Figure S14:**  $^1\text{H}$  NMR spectrum of 3'-(4-Fluorophenyl)-spiro[3H-indole-3,2'-thiazolidine]-2,4'(1H) dione (**4e**)

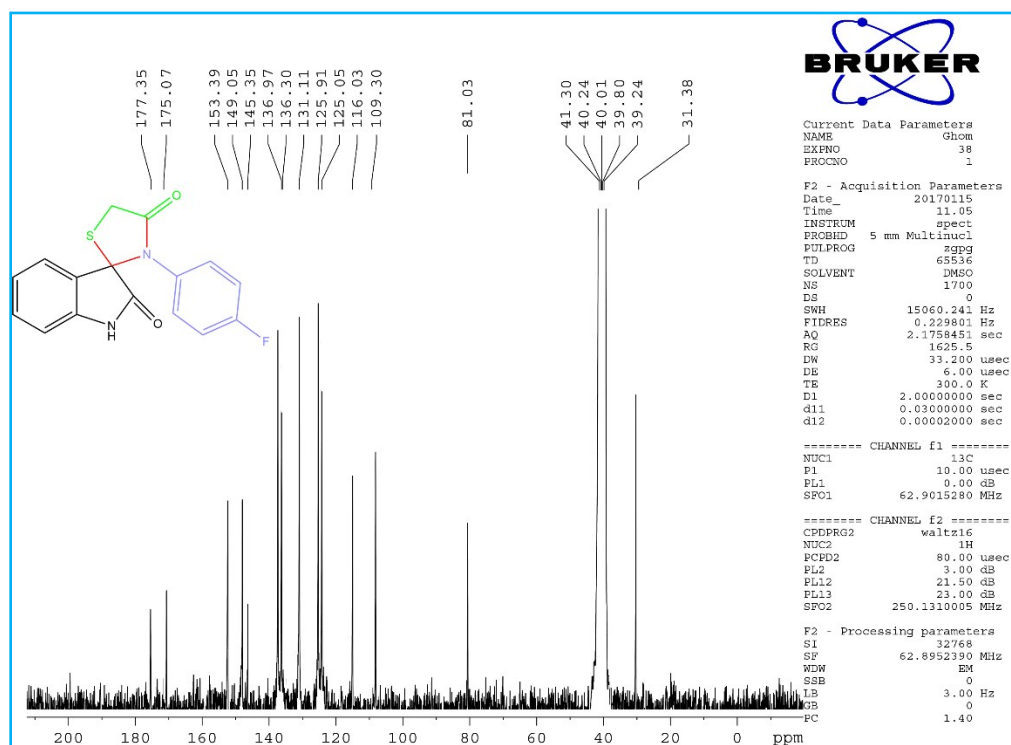

**Figure S15:**  $^{13}\text{C}$  NMR spectrum of 3'-(4-Fluorophenyl)-spiro[3H-indole-3,2'-thiazolidine]-2,4'(1H) dione (**4e**)

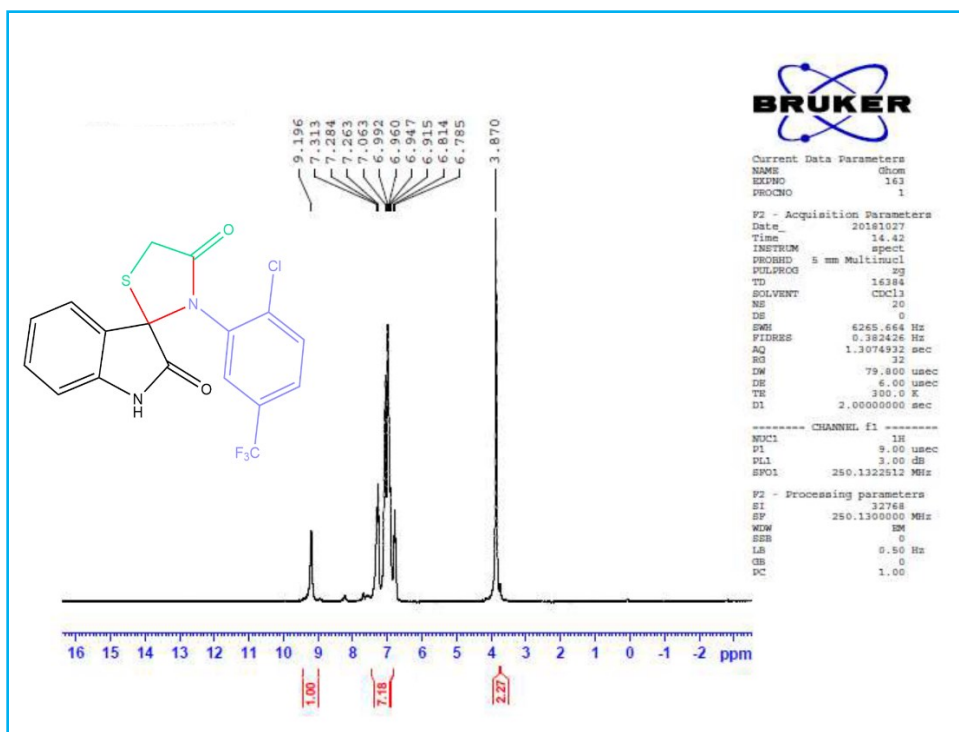

**Figure S16:**  $^1\text{H}$  NMR spectrum of 3'-(5-Trifluoromethyl-2-chlorophenyl)-spiro-[3H-indole3,2'-thiazolidine]-2,4'(1H)-dione (**4f**)

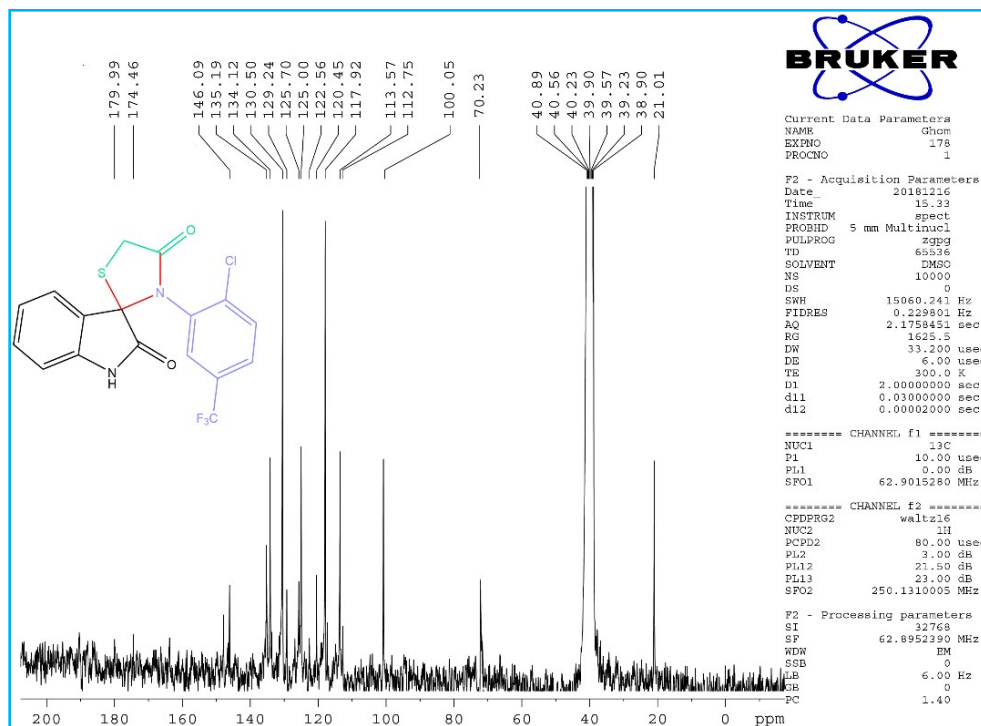

**Figure S17:**  $^{13}\text{C}$  NMR spectrum of 3'-(5-Trifluoromethyl-2-chlorophenyl)-spiro-[3H-indole3,2'-thiazolidine]-2,4'(1H)-dione (**4f**)

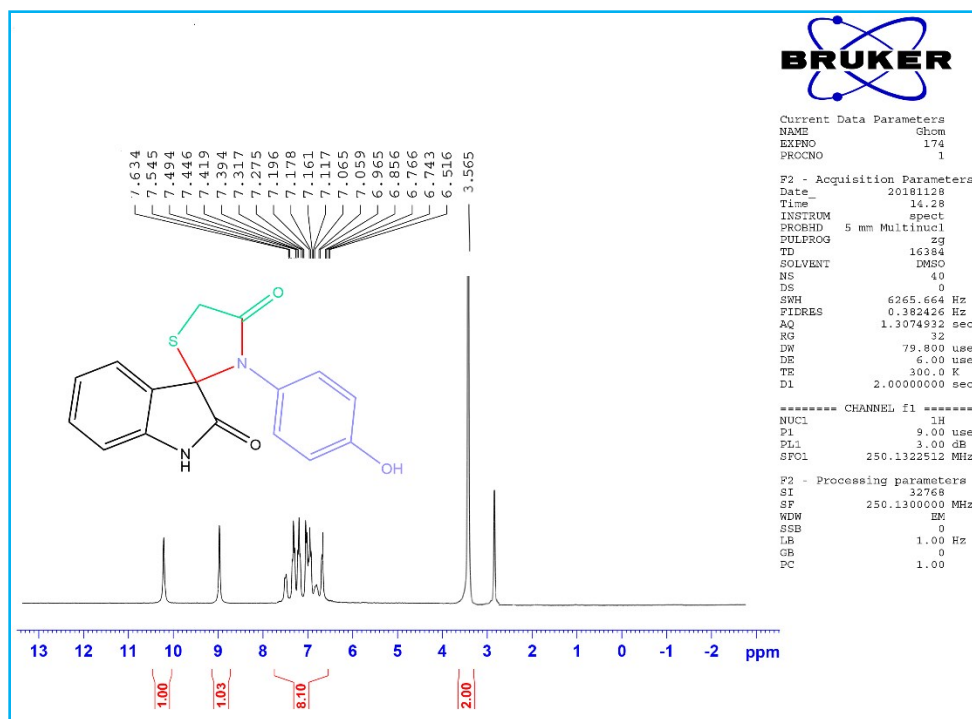

**Figure S18:**  $^1\text{H}$  NMR spectrum of 3'-(4-Hydroxyphenyl)-spiro[3H-indole-3,2'-thiazolidine]-2,4'(1H)-dione (**4g**)

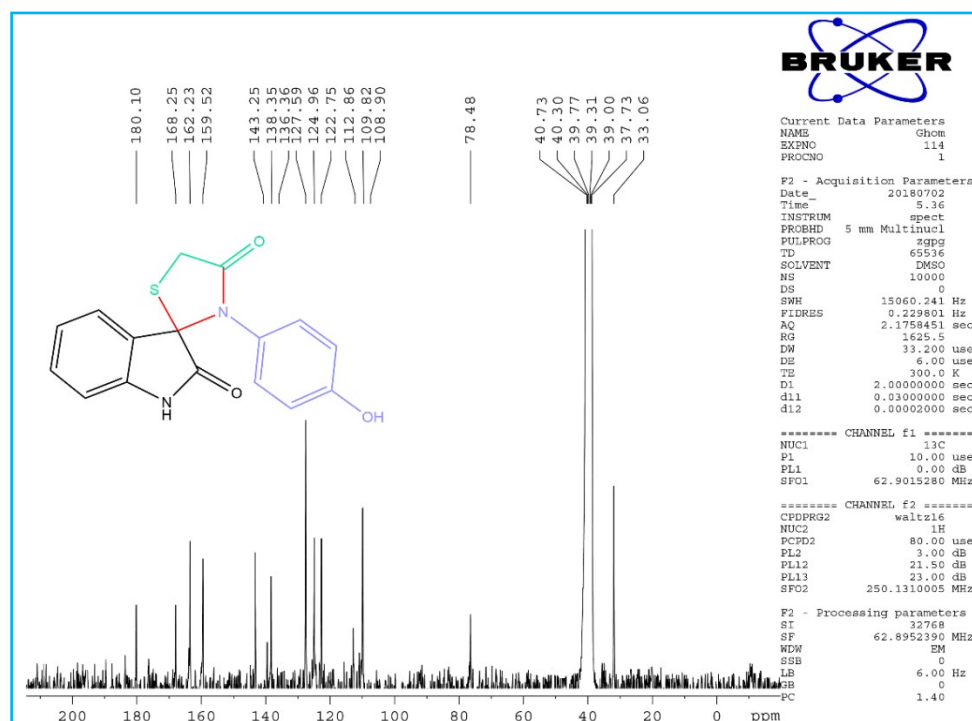

**Figure S19:**  $^{13}\text{C}$  NMR spectrum of 3'-(4-Hydroxyphenyl)-spiro[3H-indole-3,2'-thiazolidine]-2,4'(1H)-dione (**4g**)

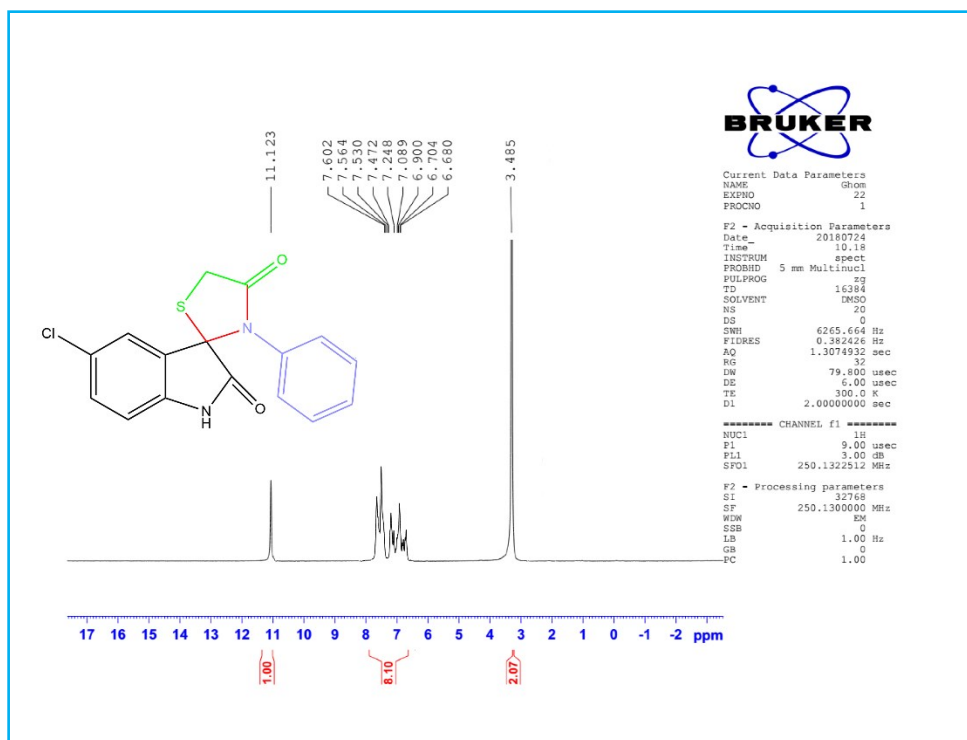

**Figure S20:**  $^1\text{H}$  NMR spectrum of 5-Chloro-3'-phenylspiro[indoline-3,2'-thiazolidine]-2,4'-dione (4h)

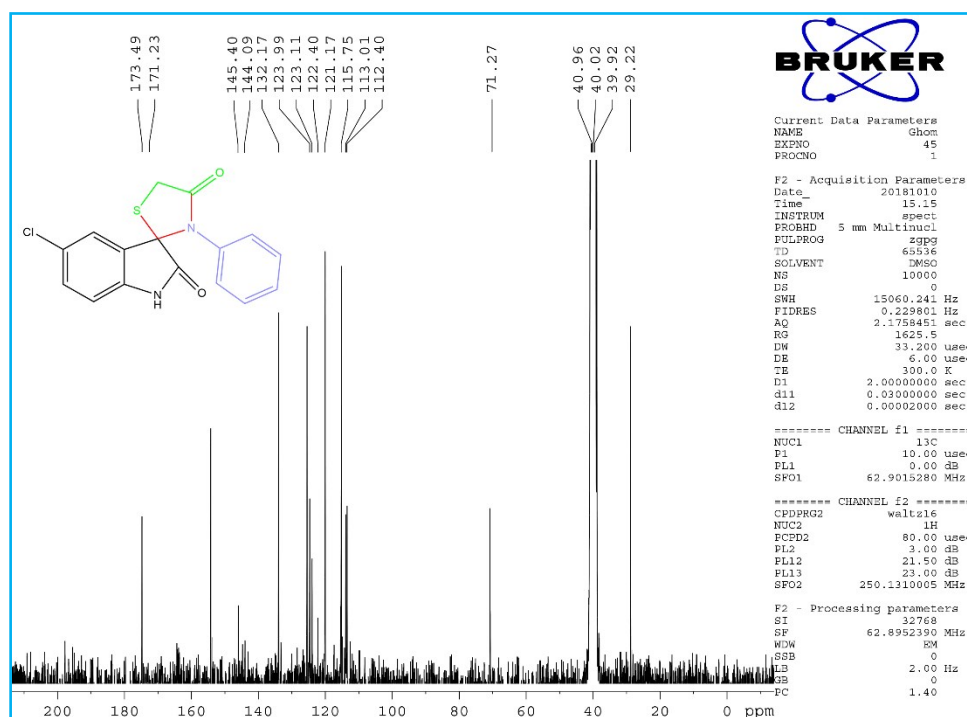

**Figure S21:**  $^{13}\text{C}$  NMR spectrum of 5-Chloro-3'-phenylspiro[indoline-3,2'-thiazolidine]-2,4'-dione (4h)

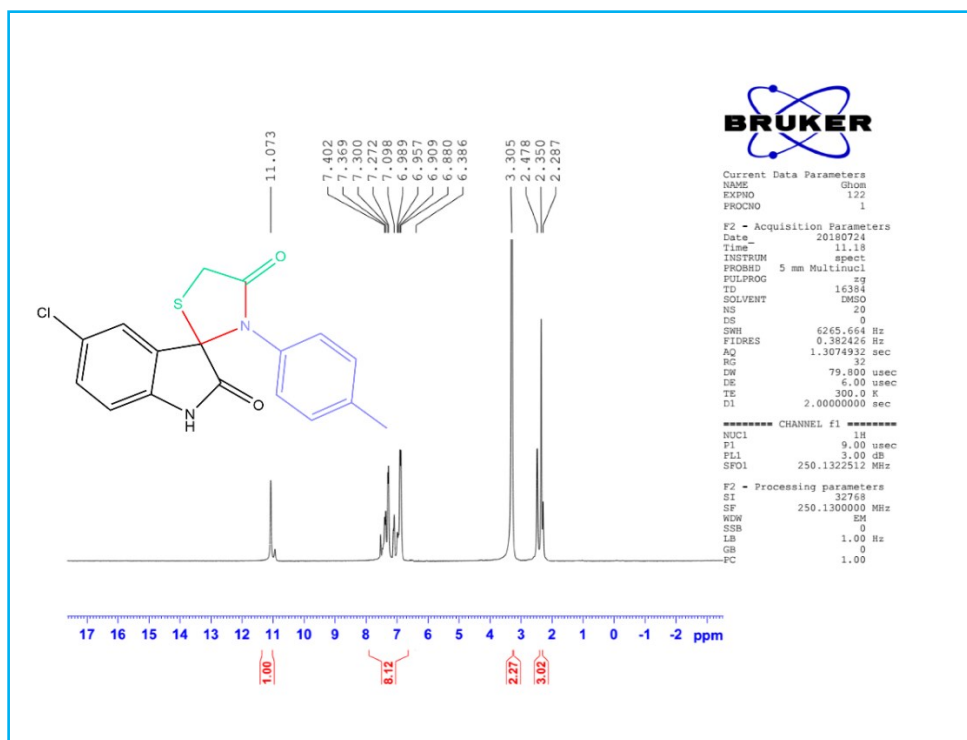

**Figure S22:**  $^1\text{H}$  NMR spectrum of 3'-(4-Methyl)- 5-chlorospiro[3H-indole-3,2'-thiazolidine]-2,4'(1H)-dione (**4i**)

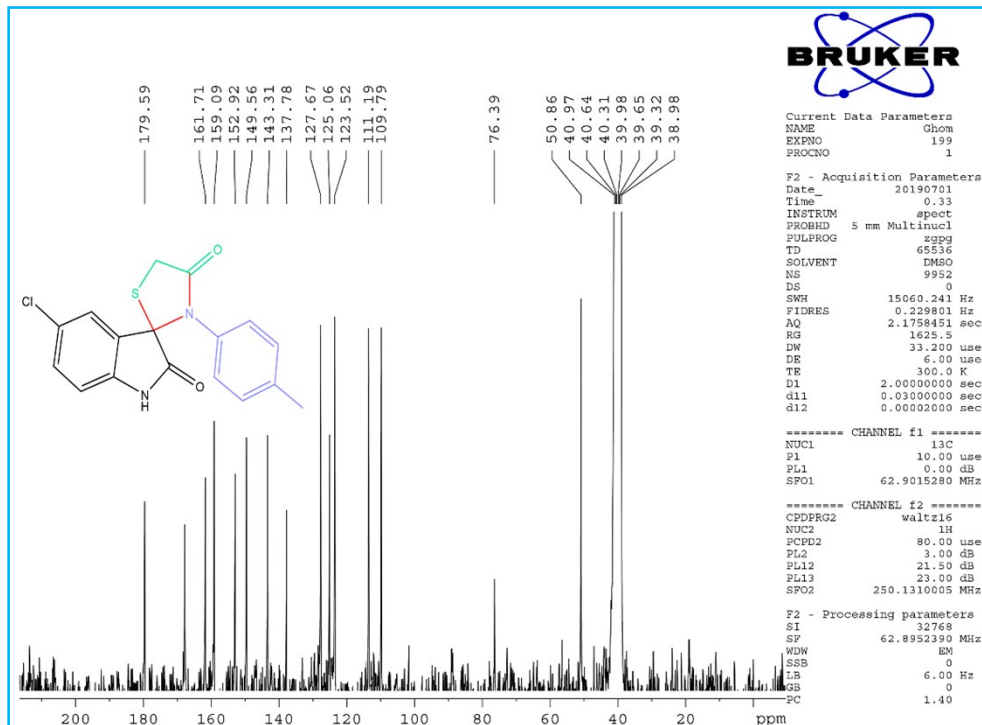

**Figure S23:**  $^{13}\text{C}$  NMR spectrum of 3'-(4-Methyl)- 5-chlorospiro[3H-indole-3,2'-thiazolidine]-2,4'(1H)-dione (**4i**)



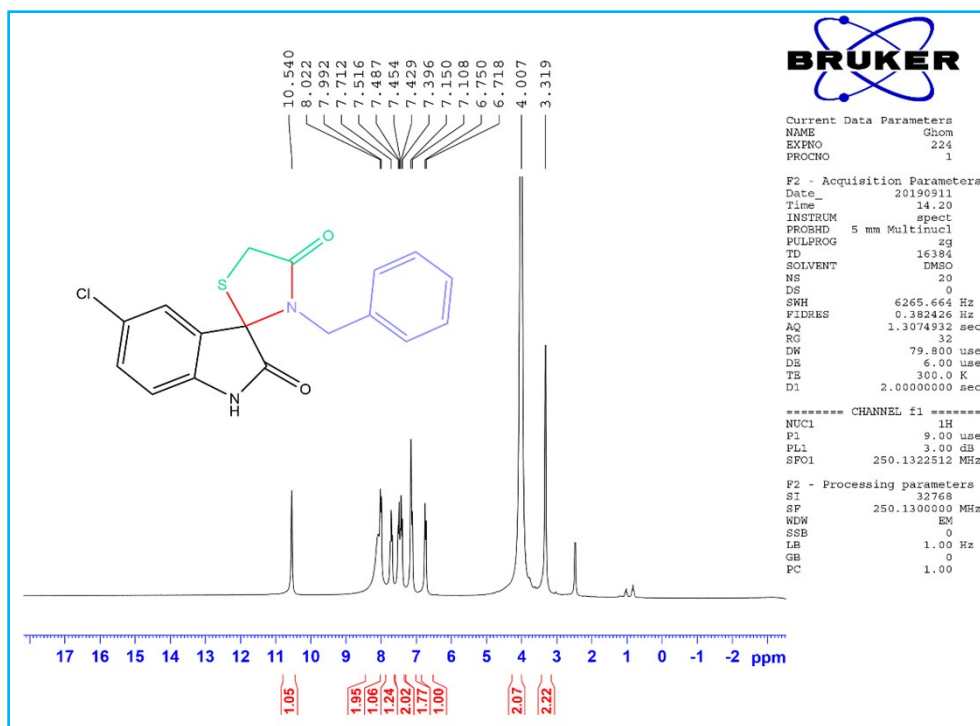

**Figure S24:**  $^1\text{H}$  NMR spectrum of 3'-Benzyl-5-chlorospiro[indoline-3,2'-thiazolidine]-2,4'-dione (4j)

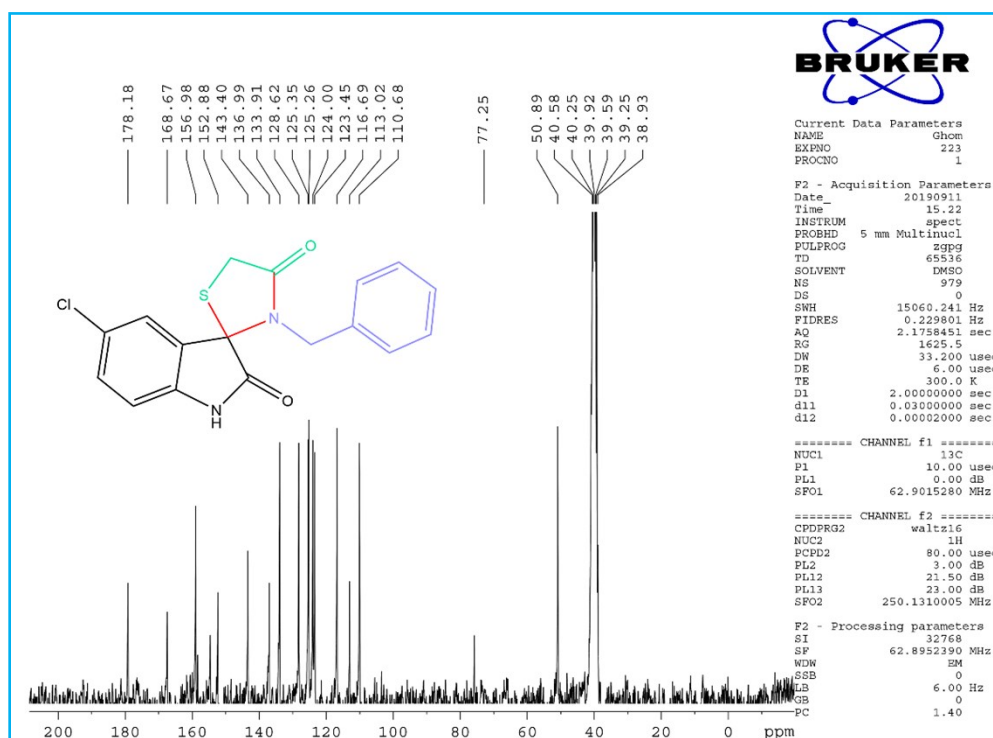

**Figure S25:**  $^{13}\text{C}$  NMR spectrum of 3'-Benzyl-5-chlorospiro[indoline-3,2'-thiazolidine]-2,4'-dione (4j)

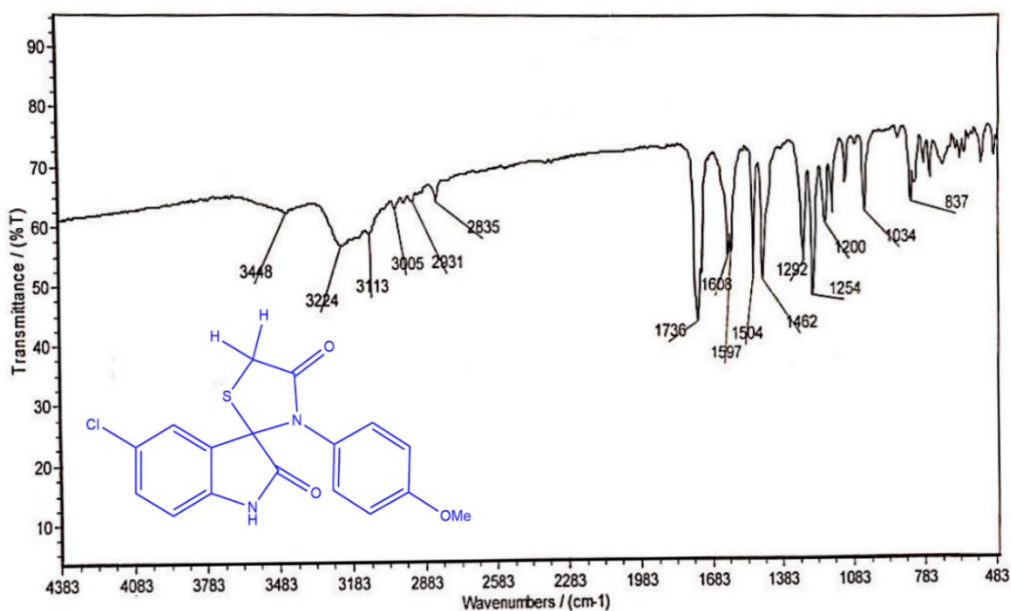

New compound, Figure S26: FT-IR (KBr) spectrum of 3'-(4-Methoxyphenyl)- 5-Chloro-3'-phenylspiro[3H-indole-3,2'-thiazolidine]-2,4'(1H)-dione (**4k**)

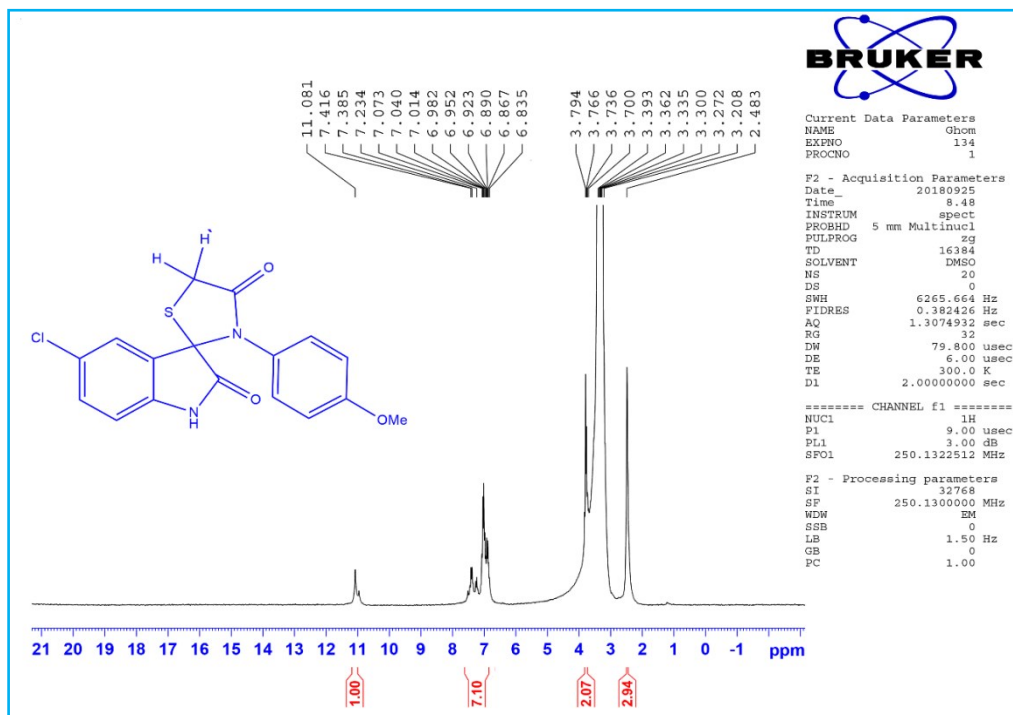

New compound, Figure S27: <sup>1</sup>H NMR spectrum of 3'-(4-Methoxyphenyl)- 5-Chloro-3'-phenylspiro[3H-indole-3,2'-thiazolidine]-2,4'(1H)-dione (**4k**)



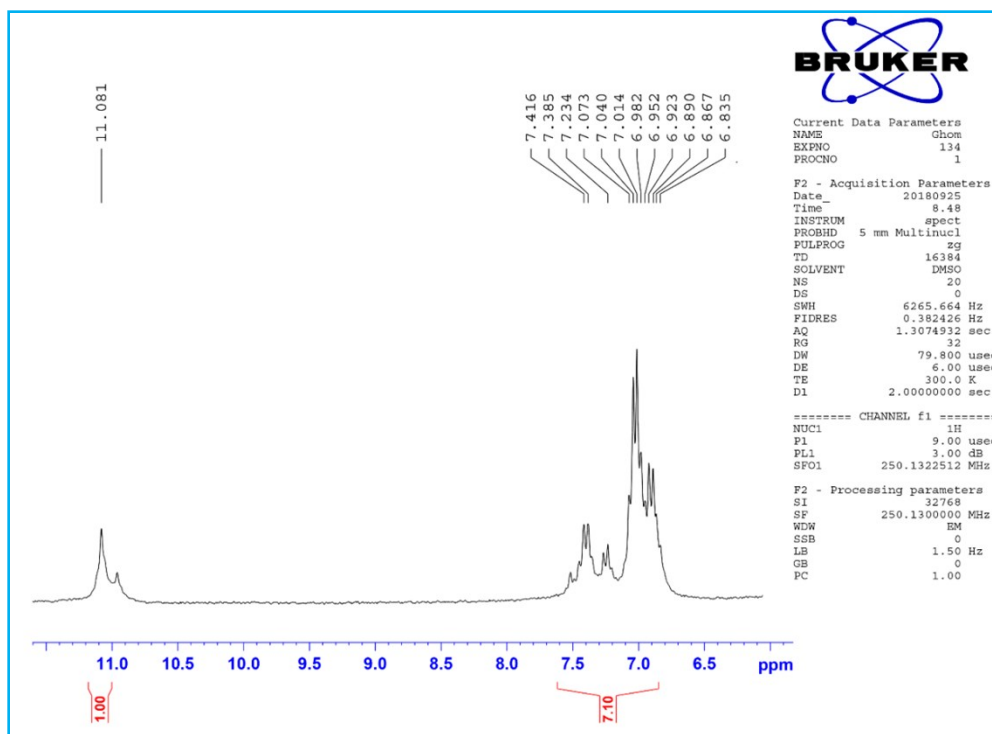

New compound, Figure S28:  $^1\text{H}$  NMR spectrum of 3'-(4-Methoxyphenyl)- 5-Chloro-3'-phenylspiro[3H-indole-3,2'-thiazolidine]-2,4'(1H)-dione (**4k**)

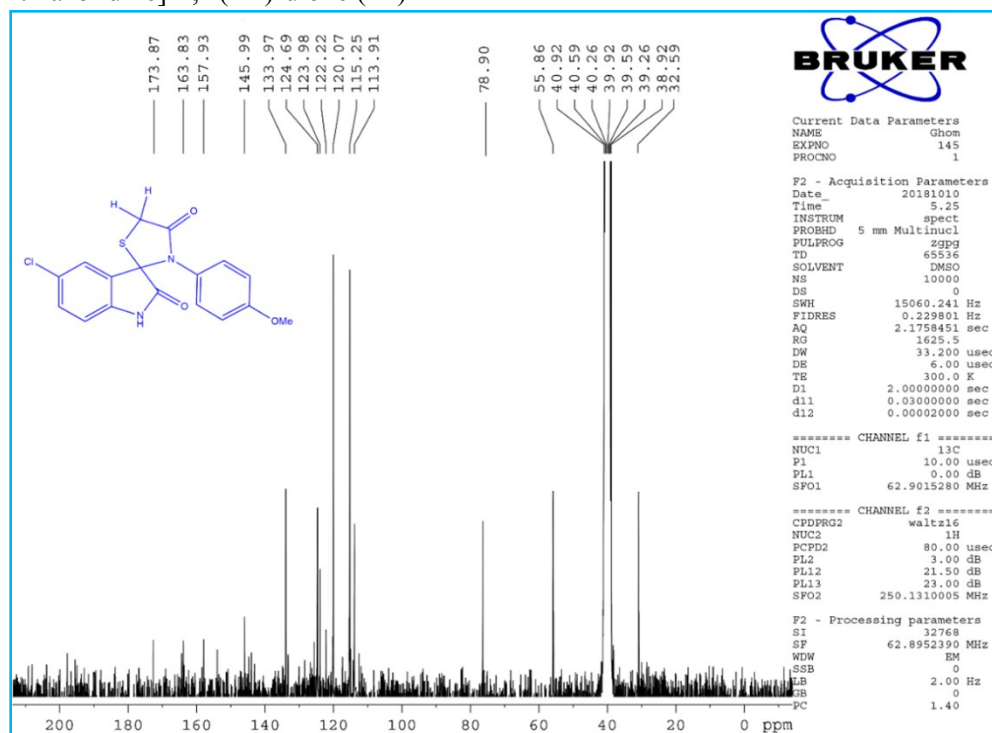

New compound, Figure S29:  $^{13}\text{C}$  NMR spectrum of 3'-(4-Methoxyphenyl)- 5-Chloro-3'-phenylspiro[3H-indole-3,2'-thiazolidine]-2,4'(1H)-dione (**4k**)

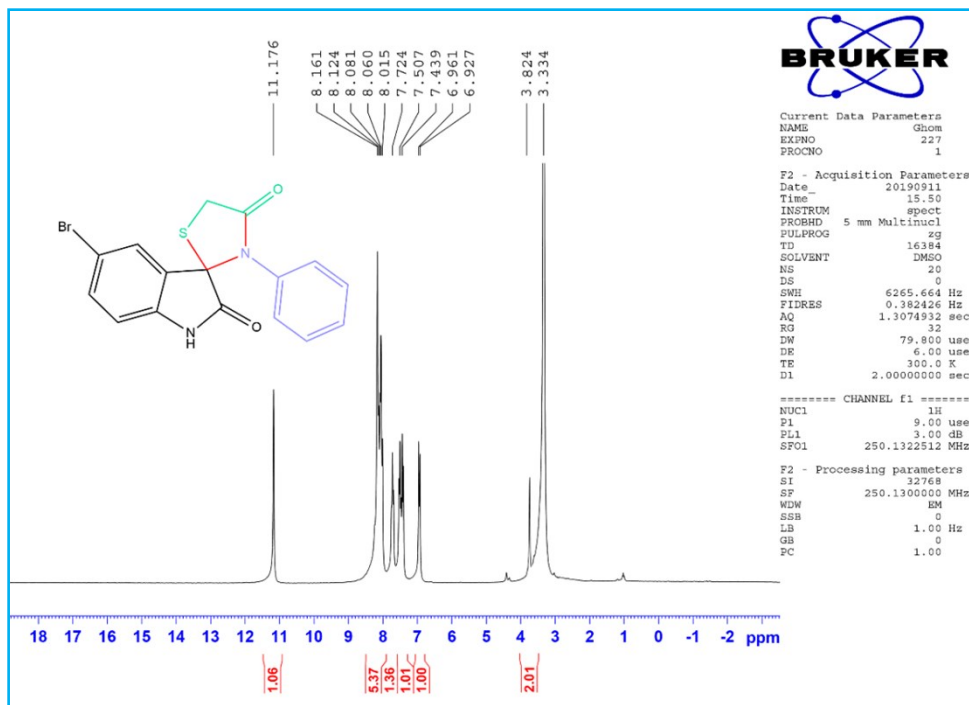

**Figure S30:**  $^1\text{H}$  NMR spectrum of 5-Bromo-3'-phenylspiro[indoline-3,2'-thiazolidine]-2,4'-dione (41)

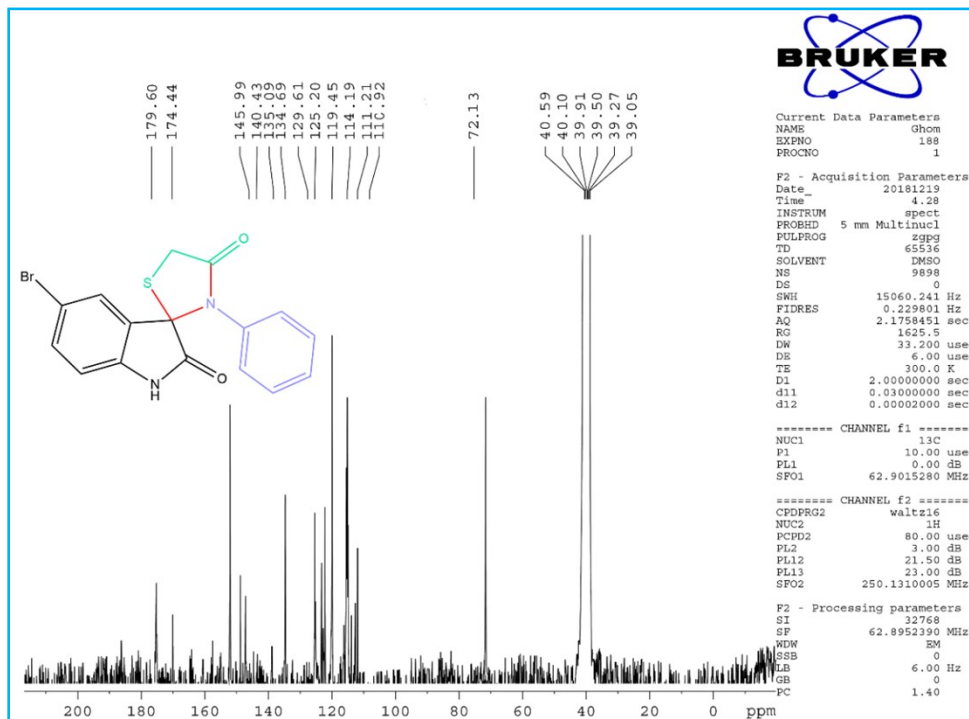

**Figure S31:**  $^{13}\text{C}$  NMR spectrum of 5-Bromo-3'-phenylspiro[indoline-3,2'-thiazolidine]-2,4'-dione (41)

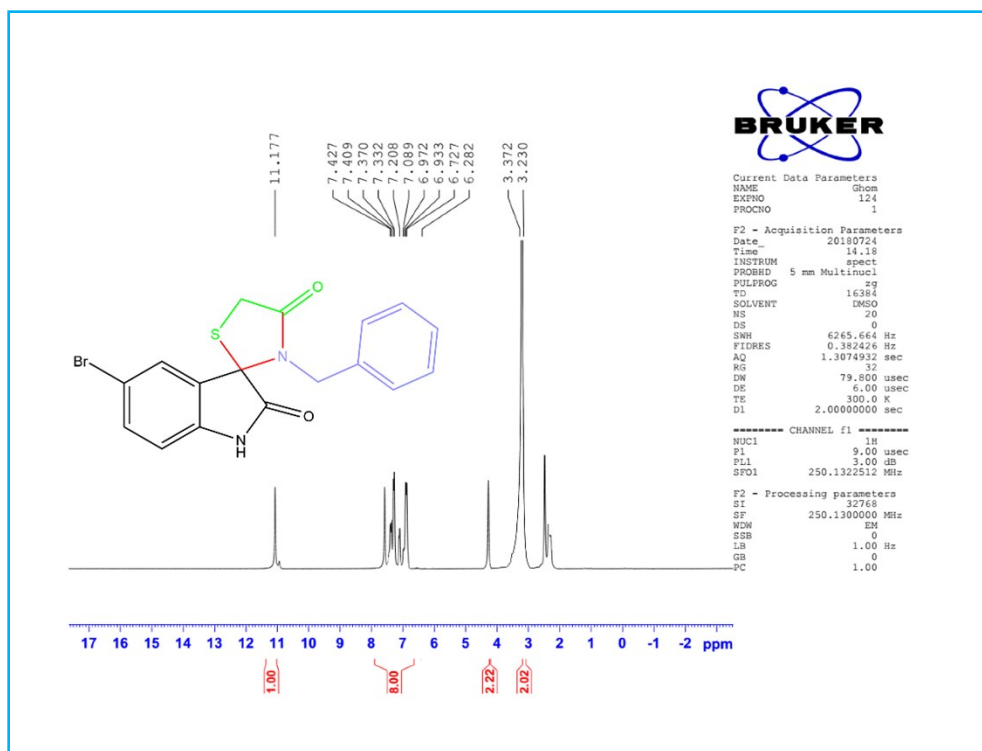

Figure S32:  $^1\text{H}$  NMR spectrum of 3'-Benzyl-5-bromospiro[indoline-3,2'-thiazolidine]-2,4'-dione (**4m**)

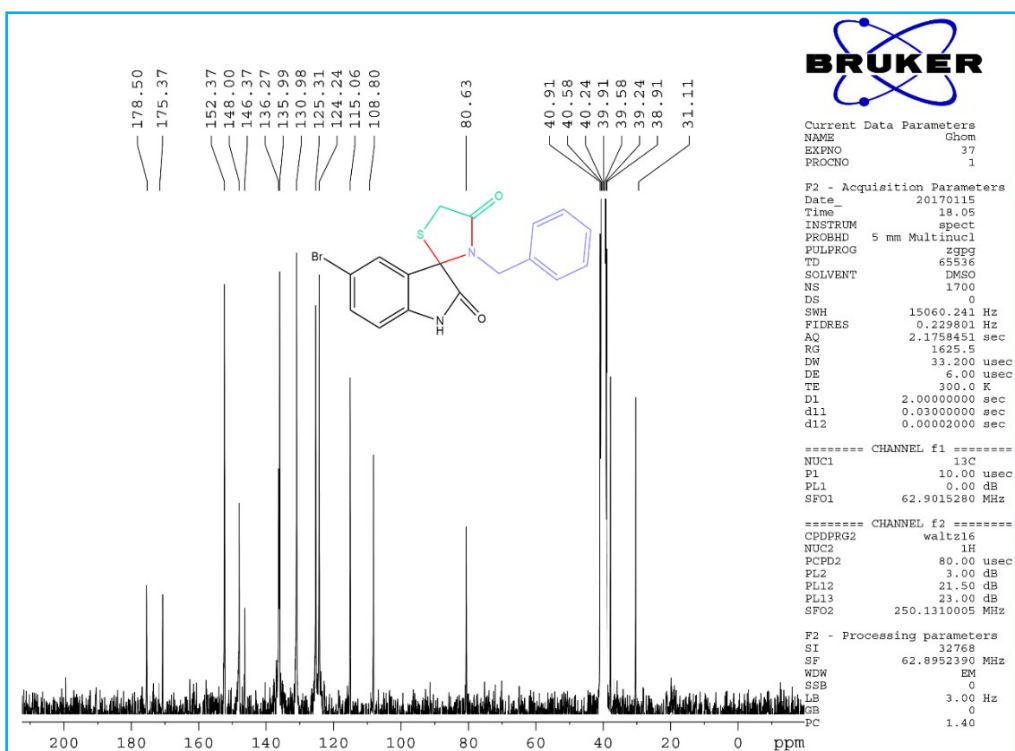

Figure S33:  $^{13}\text{C}$  NMR spectrum of 3'-Benzyl-5-bromospiro[indoline-3,2'-thiazolidine]-2,4'-dione (**4m**)

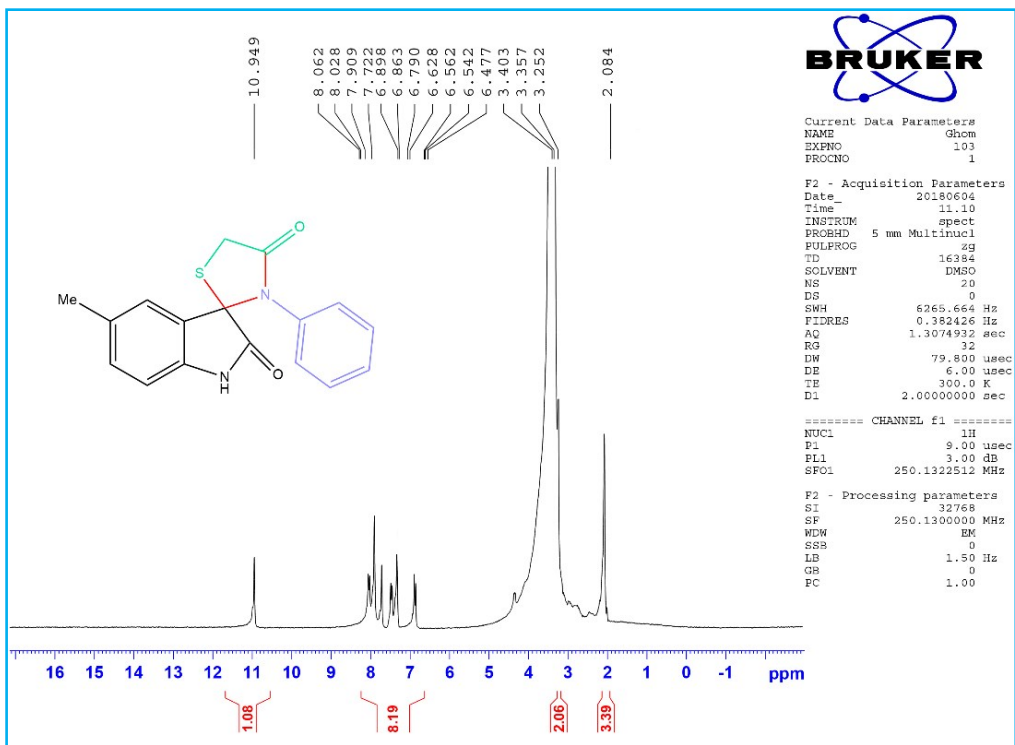

**Figure S34:**  $^1\text{H}$  NMR spectrum of 5-Methyl-3'-phenylspiro[indoline-3,2'-thiazolidine]-2,4'-dione (4n)

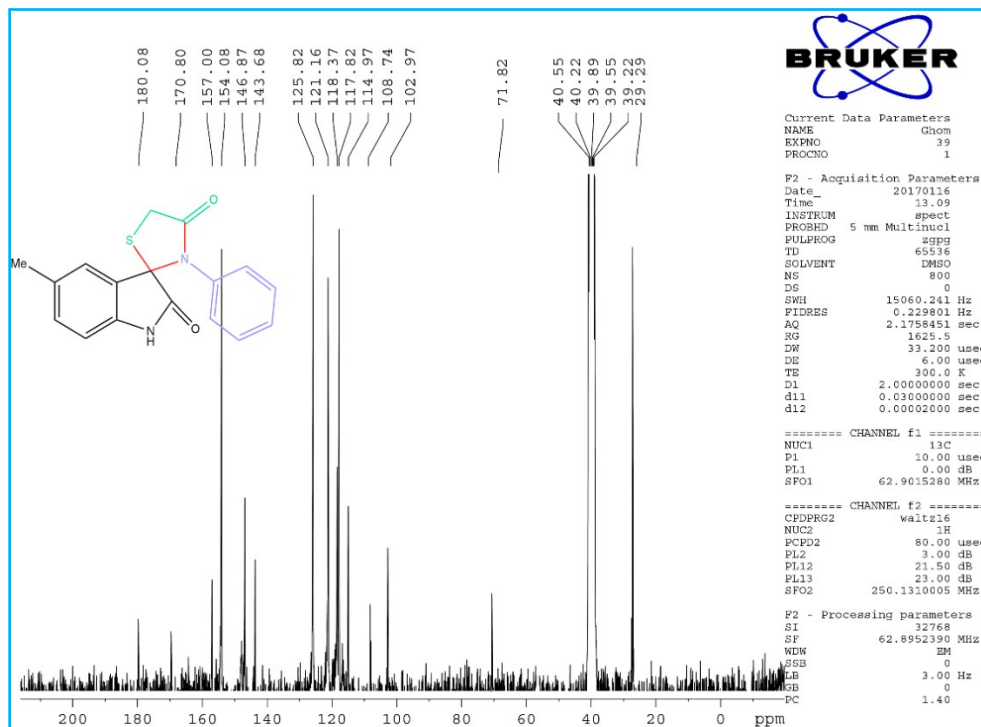

**Figure S35:**  $^{13}\text{C}$  NMR spectrum of 5-Methyl-3'-phenylspiro[indoline-3,2'-thiazolidine]-2,4'-dione (4n)

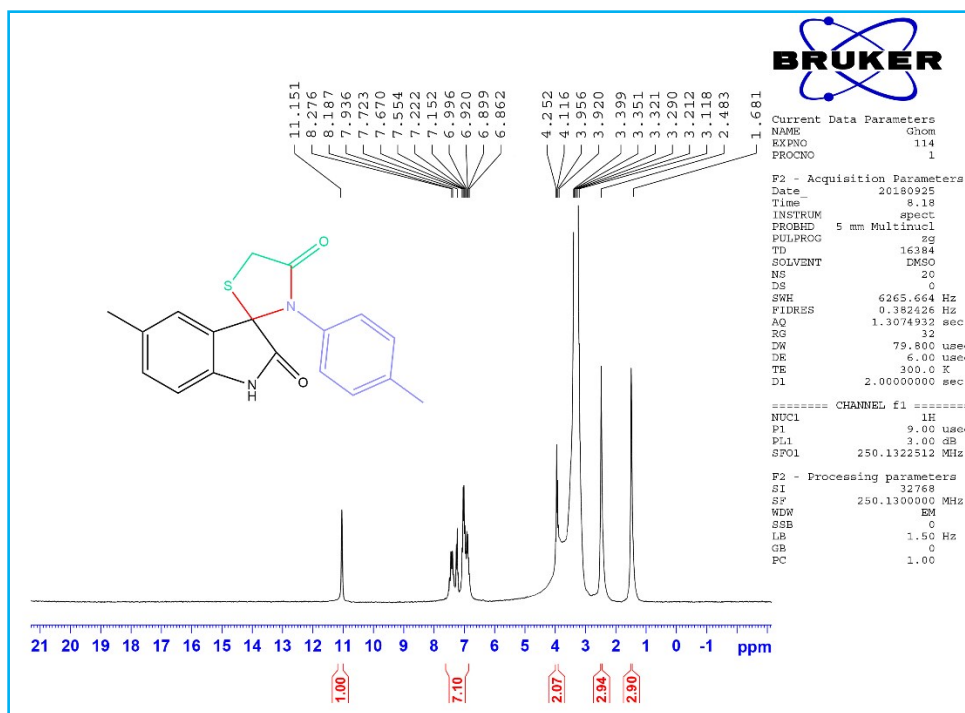

**Figure S36:**  $^1\text{H}$  NMR spectrum of 3'-(4-Methyl)- 5-methylspiro[3H-indole-3,2'-thiazolidine]-2,4'(1H)-dione (**40**)

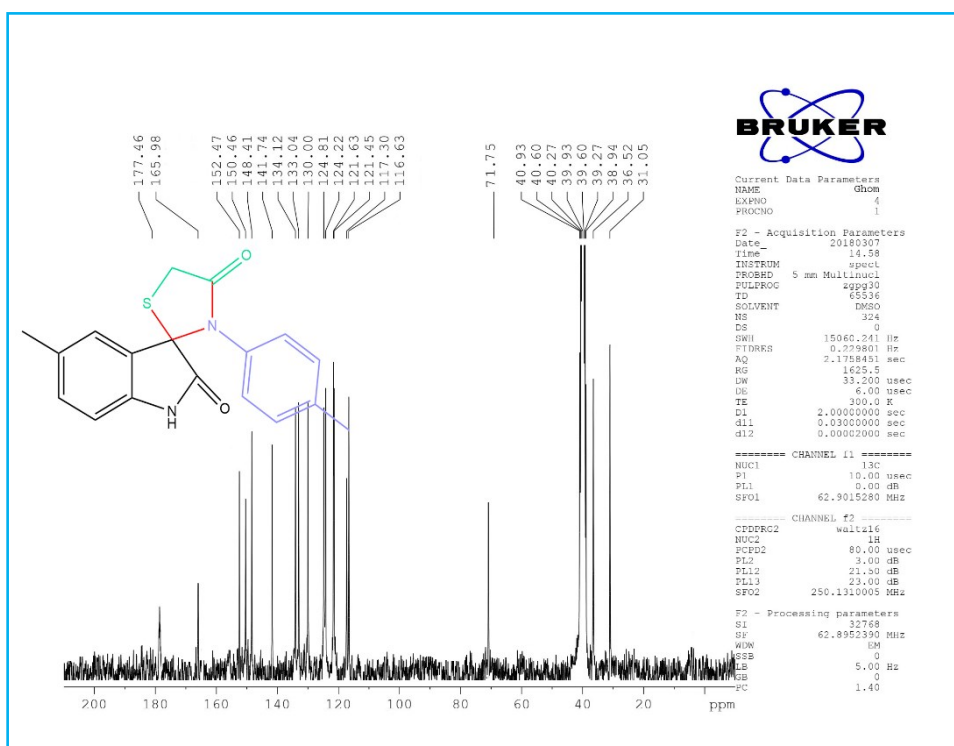

**Figure S37:**  $^{13}\text{C}$  NMR spectrum of 3'-(4-Methyl)- 5-methylspiro[3H-indole-3,2'-thiazolidine]-2,4'(1H)-dione (**40**)

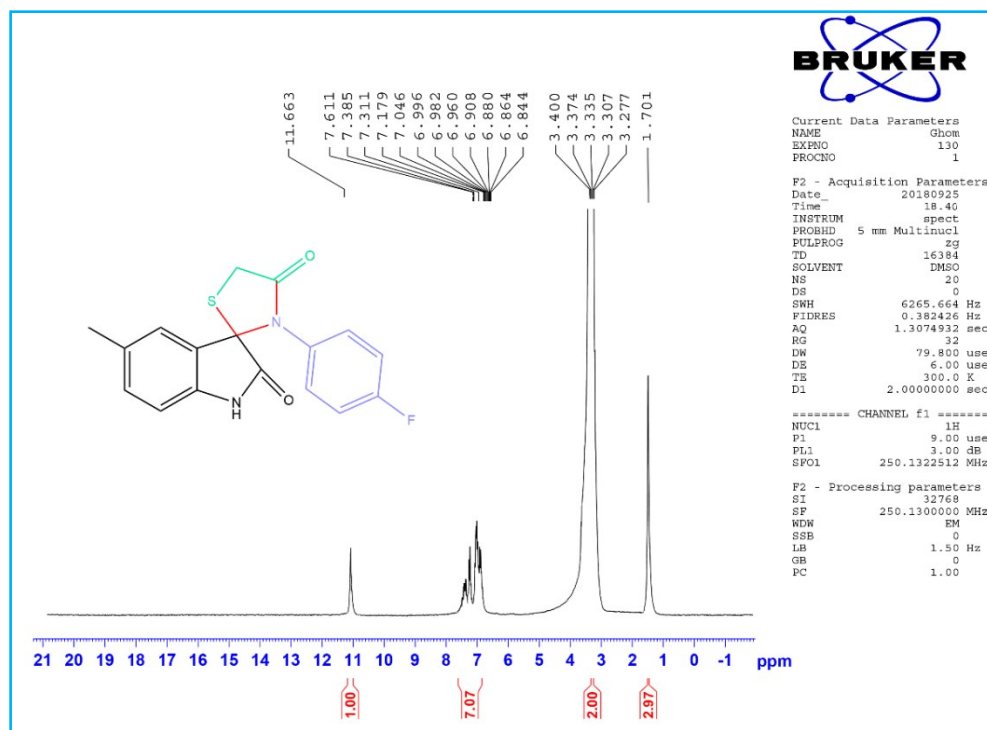

**Figure S38:**  $^1\text{H}$  NMR spectrum of 3'-(4-Fluorophenyl)- 5-methylspiro[3H-indole-3,2'-thiazolidine]-2,4'(1H)-dione (**4p**)

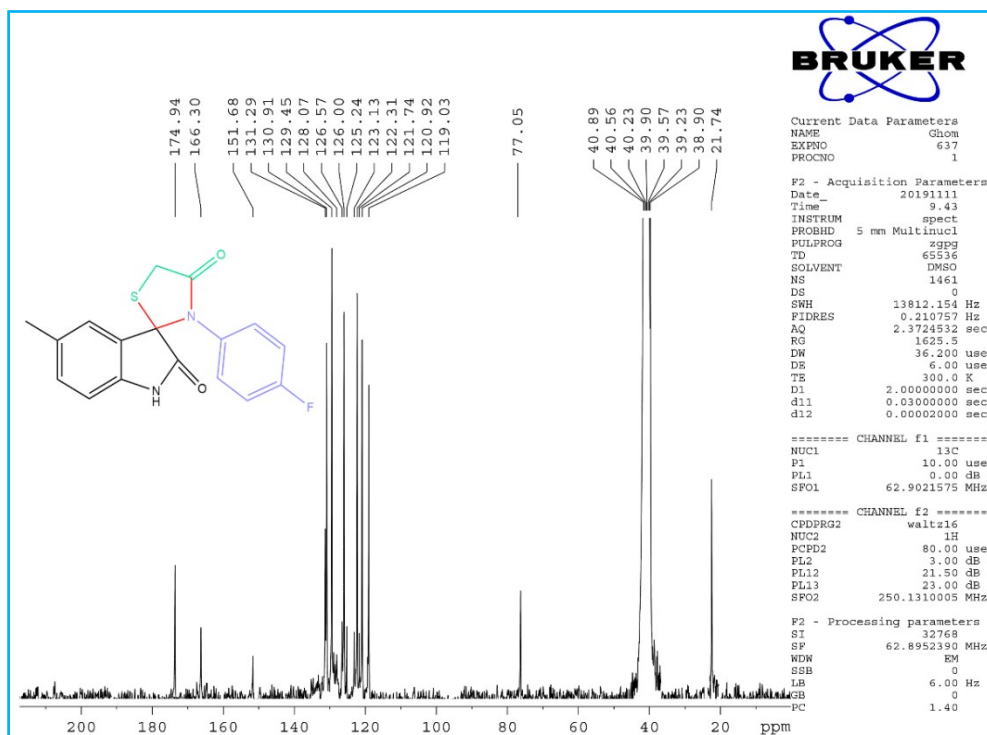

**Figure S39:**  $^{13}\text{C}$  NMR spectrum of 3'-(4-Fluorophenyl)- 5-methylspiro[3H-indole-3,2'-thiazolidine]-2,4'(1H)-dione (**4p**)



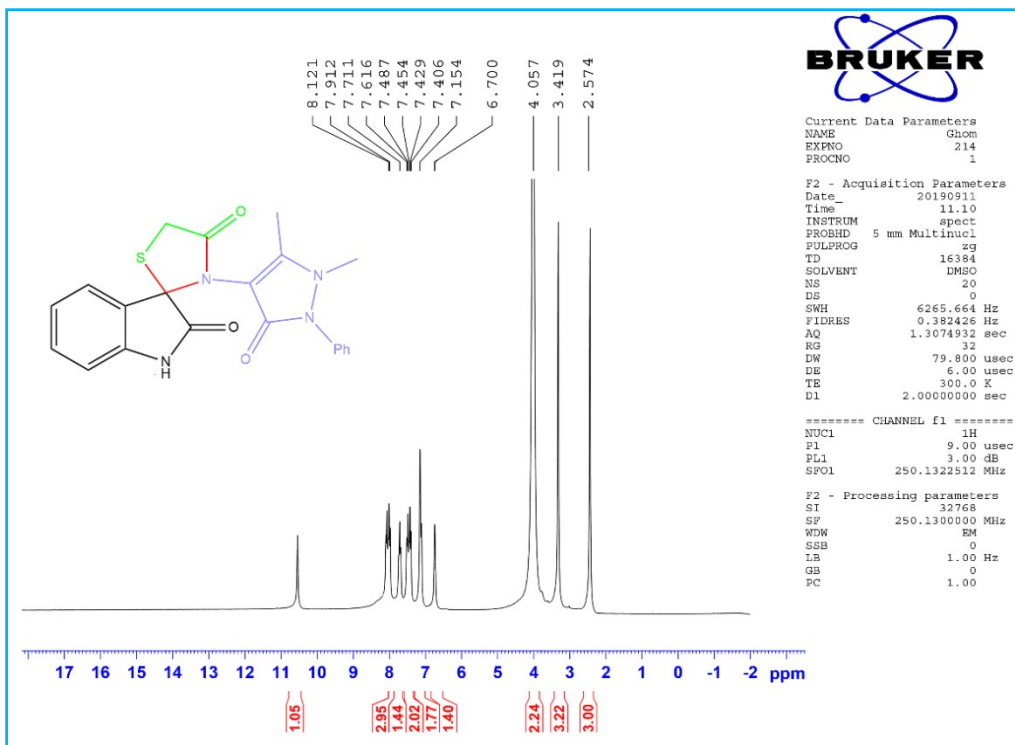

**Figure S40:**  $^1\text{H}$  NMR spectrum of 3'-(2,3-dihydro-1,5-dimethyl-3-oxo-2-phenyl-1Hpyrazol-4-yl)-spiro[3H-indole-3,2'-thiazolidine]-2,4'(1H) dione (**4q**)

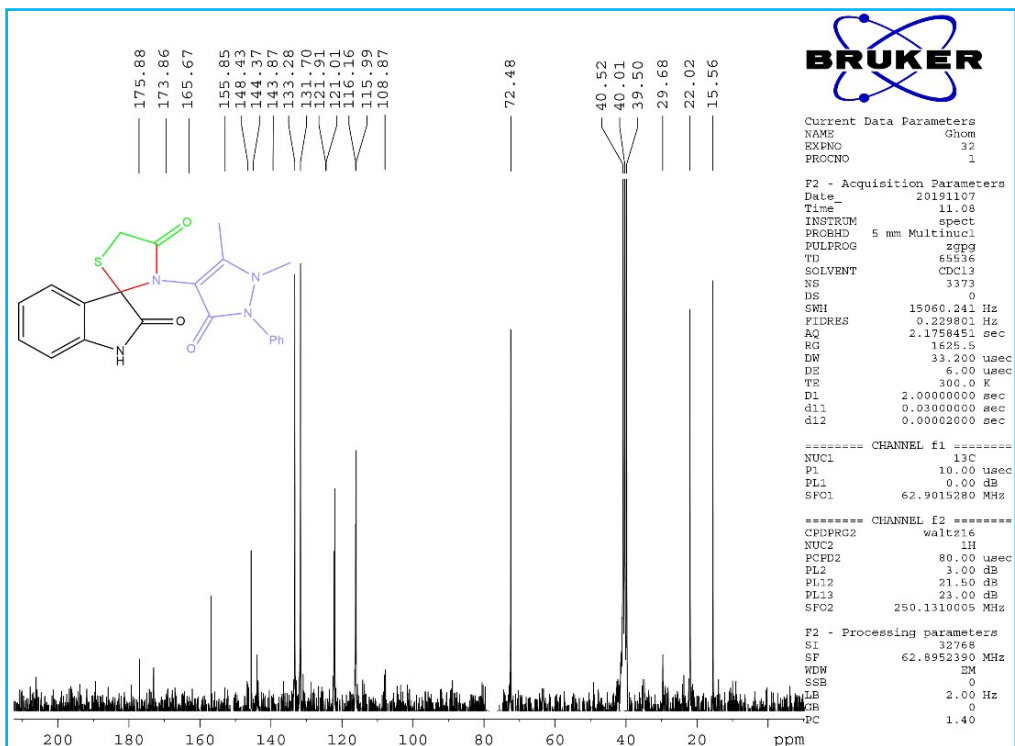

**Figure S41:**  $^{13}\text{C}$  NMR spectrum of 3'-(2,3-dihydro-1,5-dimethyl-3-oxo-2-phenyl-1Hpyrazol-4-yl)-spiro[3H-indole-3,2'-thiazolidine]-2,4'(1H) dione (**4q**)

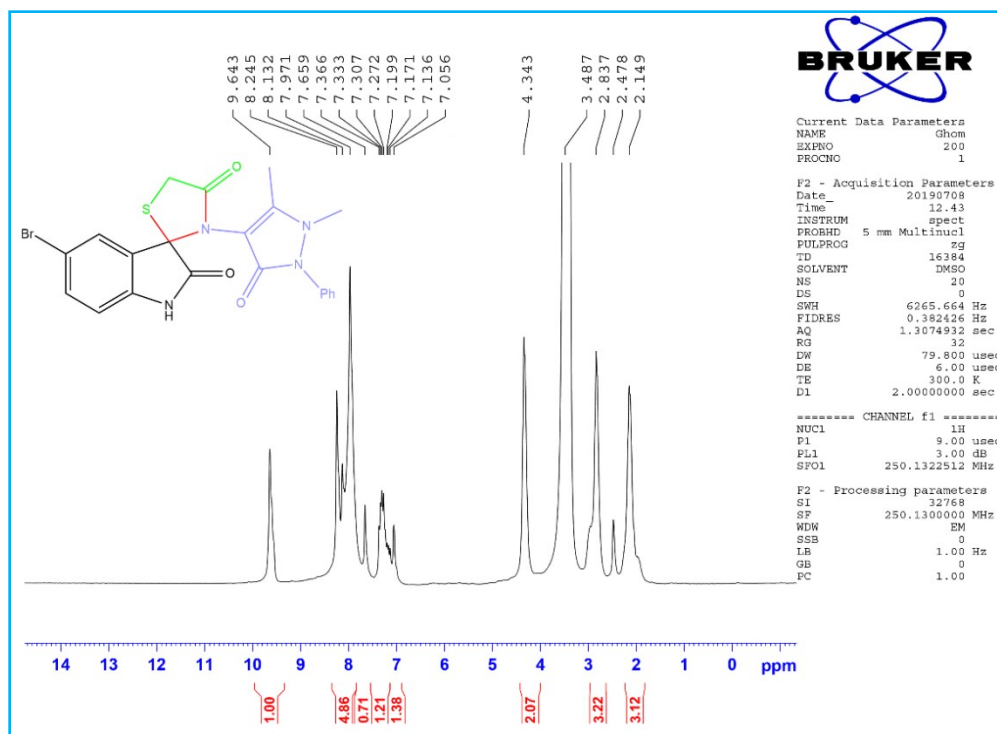

**Figure S42:**  $^1\text{H}$  NMR spectrum of 5-Bromo-3'-(2,3-dihydro-1,5-dimethyl-3-oxo-2-phenyl-1Hpyrazol-4-yl)-spiro[3H-indole-3,2'-thiazolidine]-2,4'(1H) dione (**4r**)

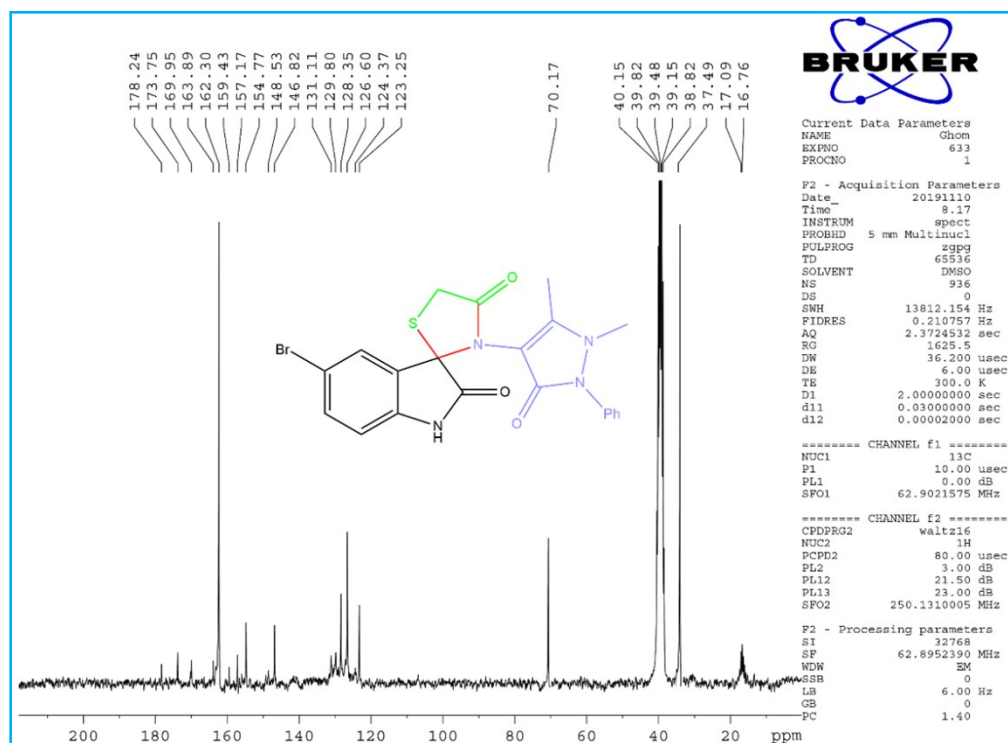

**Figure S43:**  $^{13}\text{C}$  NMR spectrum of 5-Bromo-3'-(2,3-dihydro-1,5-dimethyl-3-oxo-2-phenyl-1Hpyrazol-4-yl)-spiro[3H-indole-3,2'-thiazolidine]-2,4'(1H) dione (**4r**)



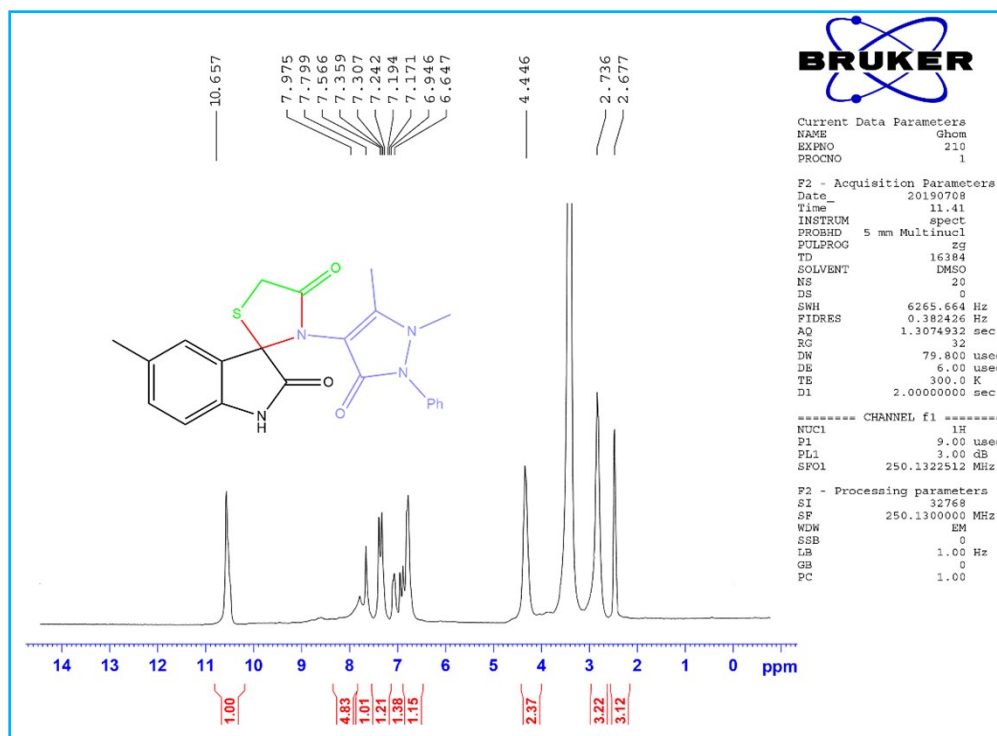

**Figure S44:**  $^1\text{H}$  NMR spectrum of 5-Methyl-3'-(2,3-dihydro-1,5-dimethyl-3-oxo-2-phenyl-1Hpyrazol-4-yl)-spiro[3H-indole-3,2'-thiazolidine]-2,4'(1H) dione (**4s**)

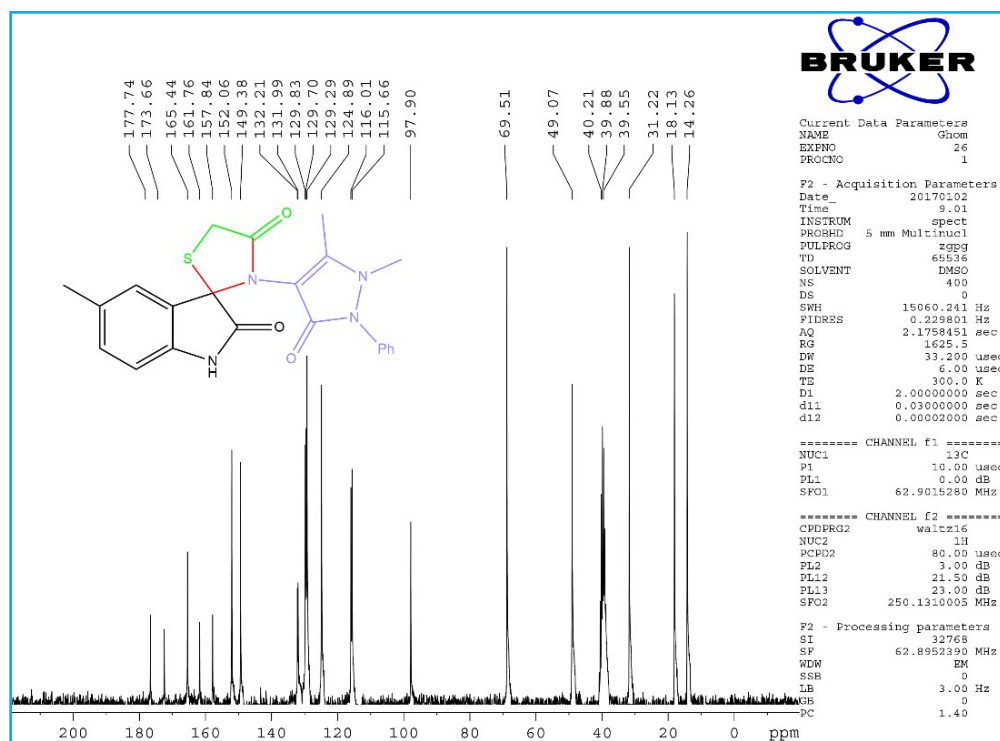

**Figure S45:**  $^{13}\text{C}$  NMR spectrum of 5-Methyl-3'-(2,3-dihydro-1,5-dimethyl-3-oxo-2-phenyl-1Hpyrazol-4-yl)-spiro[3H-indole-3,2'-thiazolidine]-2,4'(1H) dione (**4s**)

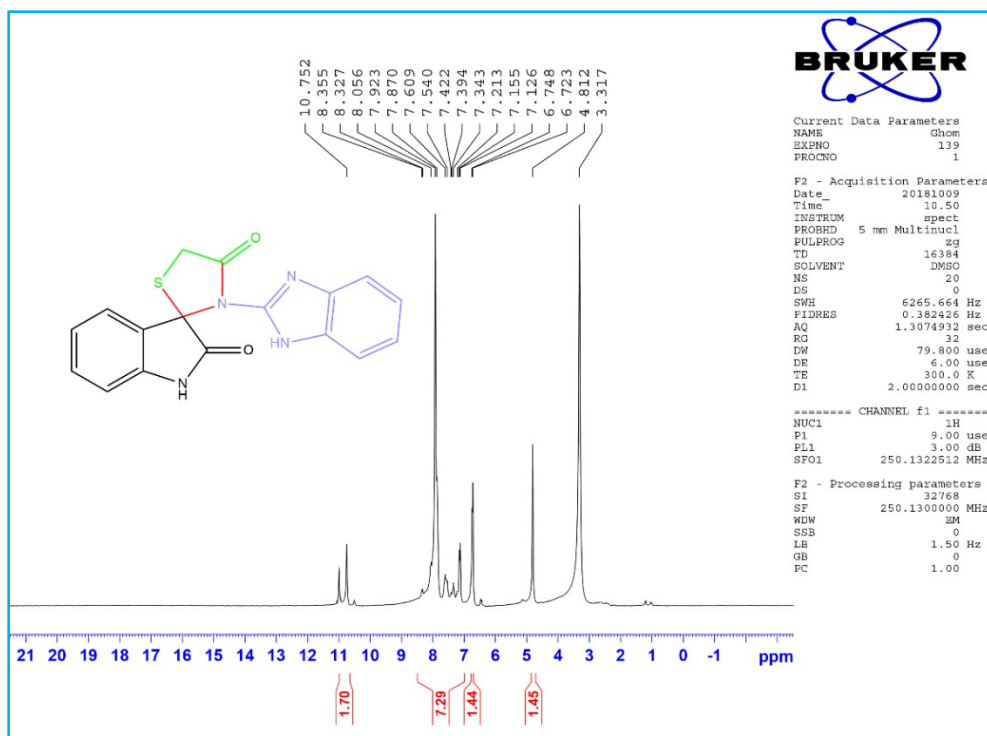

**Figure S46:**  $^1\text{H}$  NMR spectrum of 3'-(1H-benzimidazol-2-yl)-spiro-[3H-indole-3,2' thiazolidine]-2,4'(1H)-dione (**4t**)

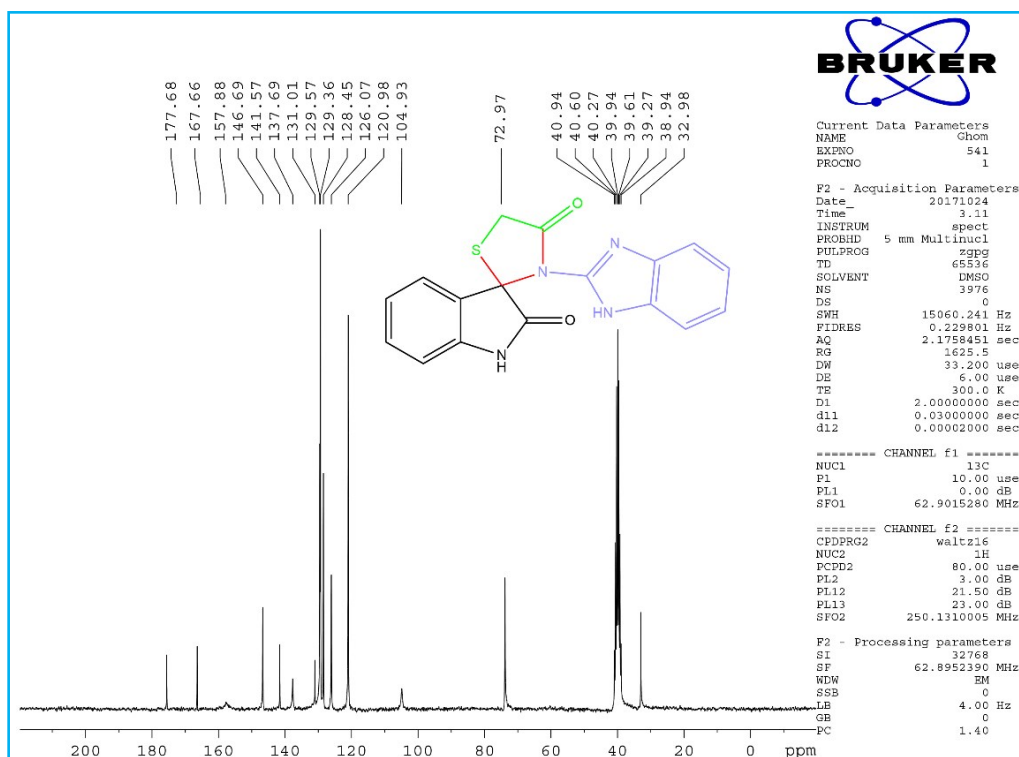

**Figure S47:**  $^{13}\text{C}$  NMR spectrum of 3'-(1H-benzimidazol-2-yl)-spiro-[3H-indole-3,2' thiazolidine]-2,4'(1H)-dione (**4t**)

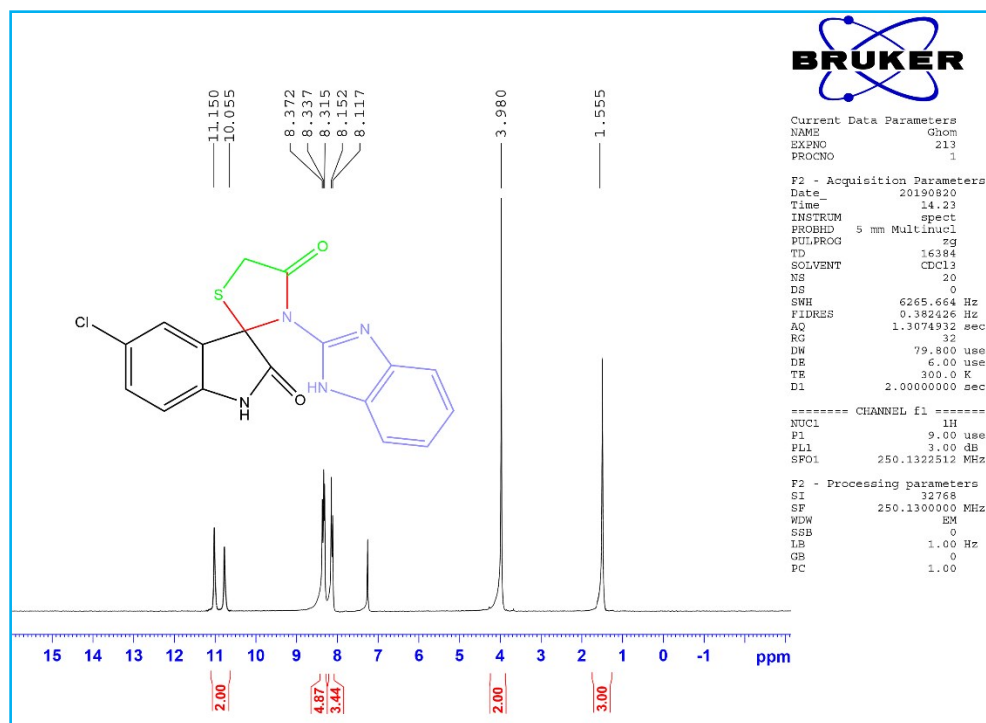

**Figure S48:**  $^1\text{H}$  NMR spectrum of 5-Chloro-3'-(1H-benzimidazol-2-yl)-spiro-[3H-indole 3,2'-thiazolidine]-2,4'(1H)-dione (**4u**)

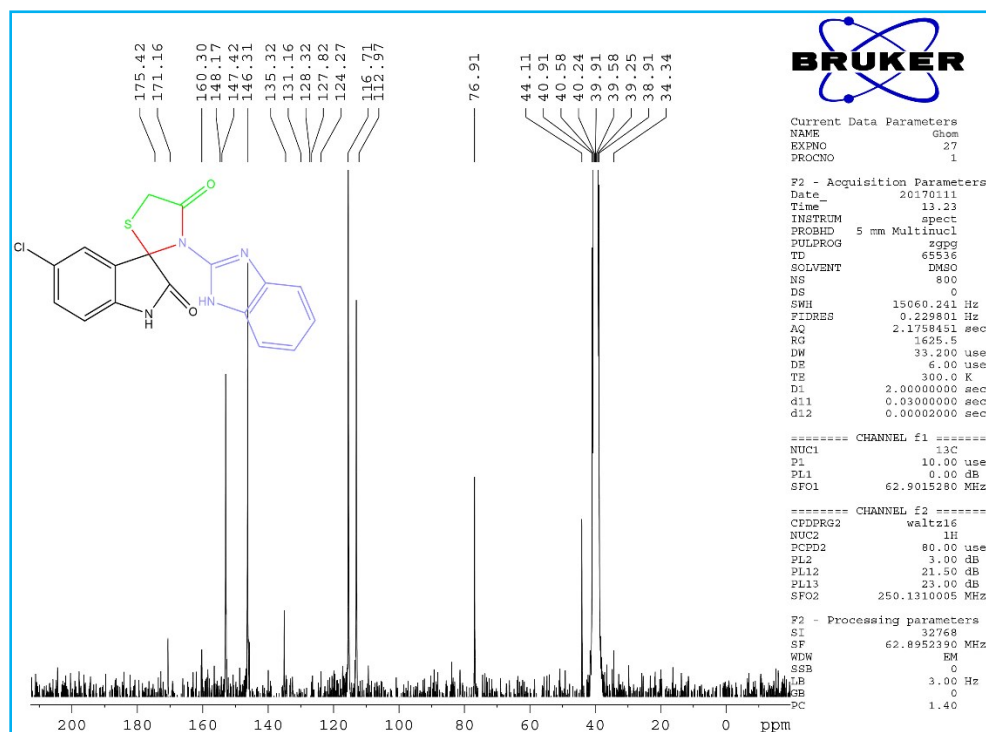

**Figure S49:**  $^{13}\text{C}$  NMR spectrum of 5-Chloro-3'-(1H-benzimidazol-2-yl)-spiro-[3H-indole 3,2'-thiazolidine]-2,4'(1H)-dione (**4u**)

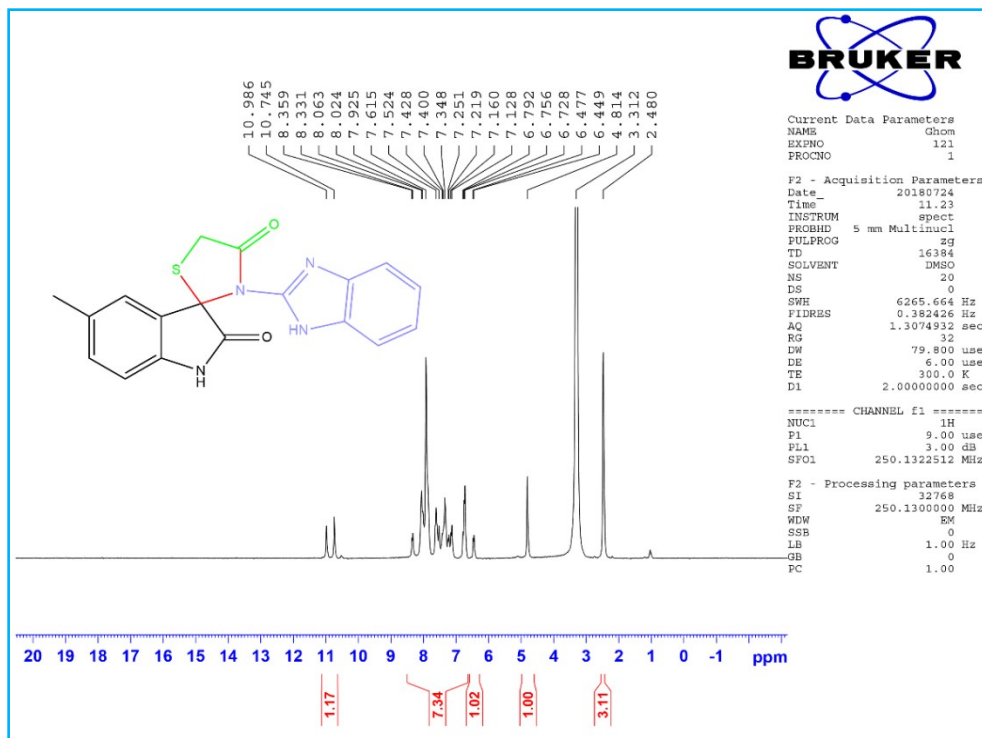

**Figure S50:**  $^1\text{H}$  NMR spectrum of 5-Methyl-3'-(1H-benzimidazol-2-yl)-spiro-[3H-indole3,2`thiazolidine]-2,4'(1H)-dione (**4v**)

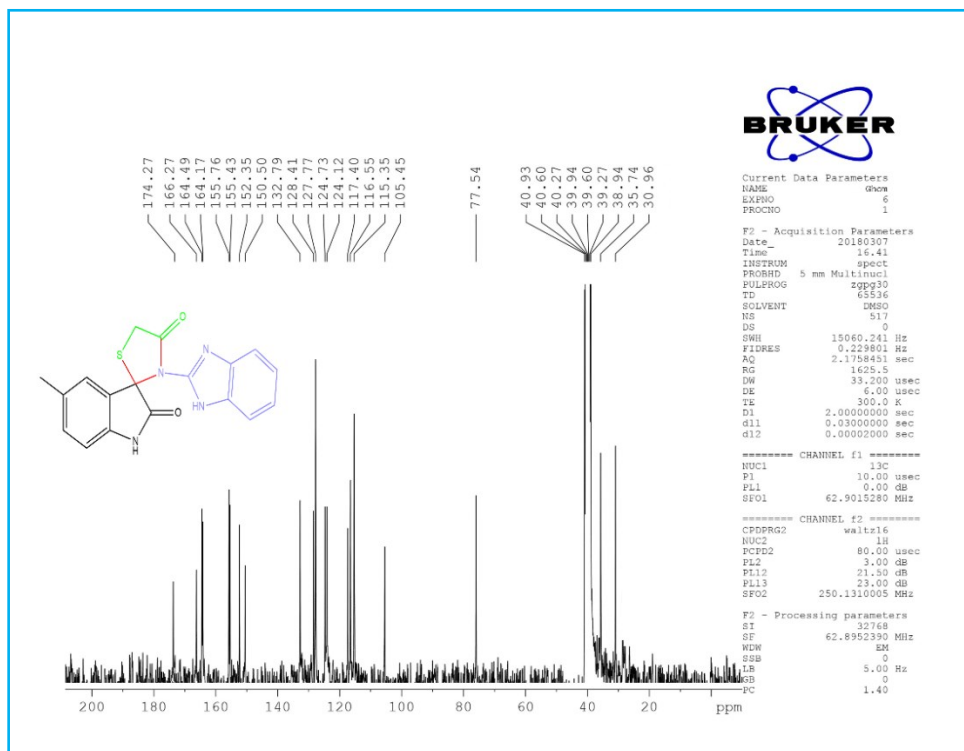

**Figure S51:**  $^{13}\text{C}$  NMR spectrum of 5-Methyl-3'-(1H-benzimidazol-2-yl)-spiro-[3H-indole3,2`thiazolidine]-2,4'(1H)-dione (**4v**)

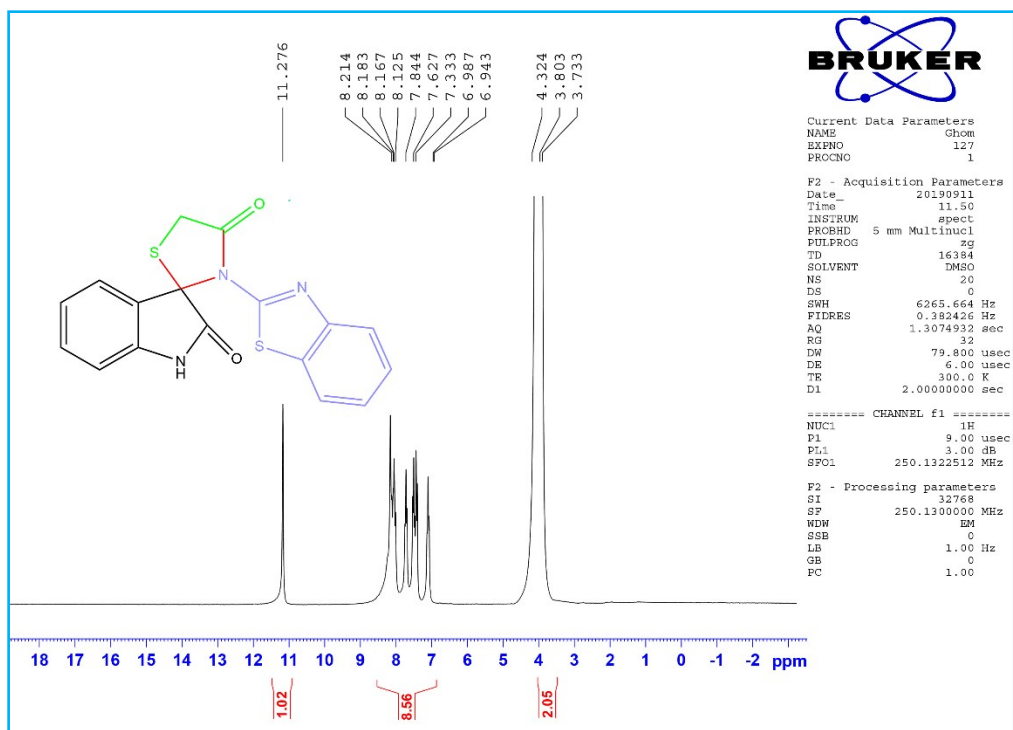

**Figure S52:**  $^1\text{H}$  NMR spectrum of 3'-(1,3-Benzothiazol-2-yl)-spiro-[3H-indole-3,2' thiazolidine]2,4'-(1H)-dione (**4w**)

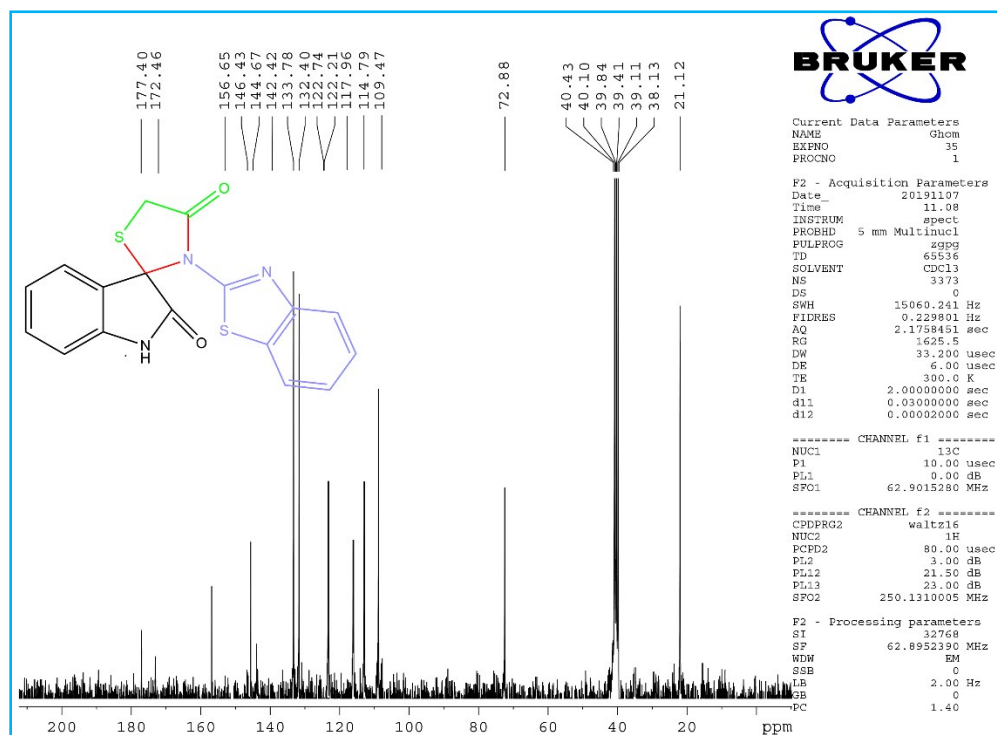

**Figure S53:**  $^{13}\text{C}$  NMR spectrum of 3'-(1,3-Benzothiazol-2-yl)-spiro-[3H-indole-3,2' thiazolidine]2,4'-(1H)-dione (**4w**)

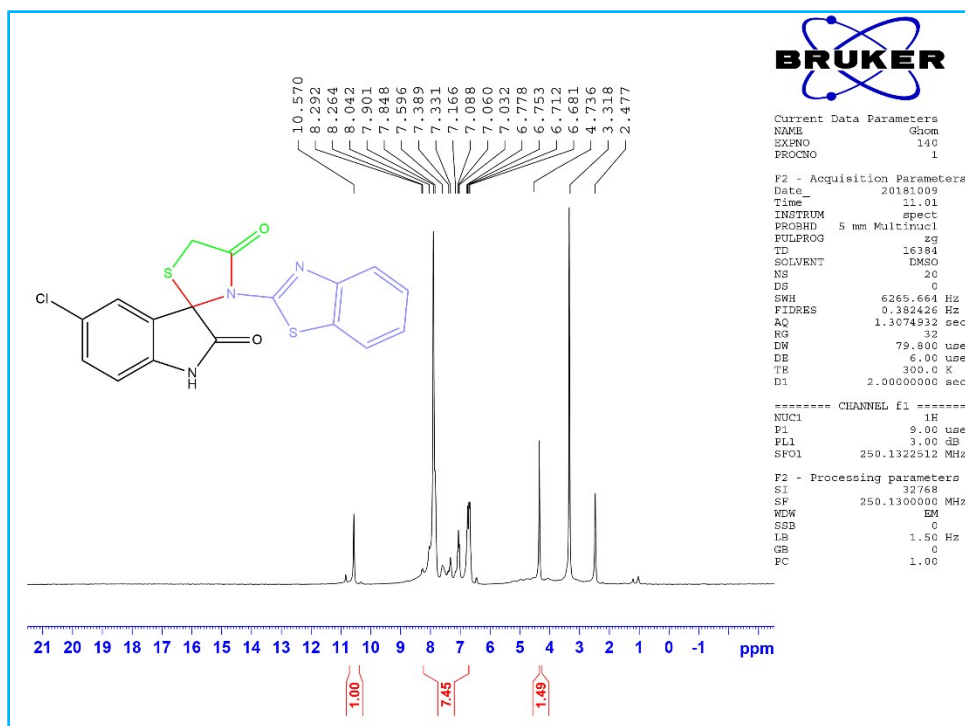

**Figure S54:**  $^1\text{H}$  NMR spectrum of 5-Chloro-3'-(1,3-benzothiazol-2-yl)-spiro-[3H-indole-3,2'thiazolidine]-2,4'(1H)-dione (**4x**)

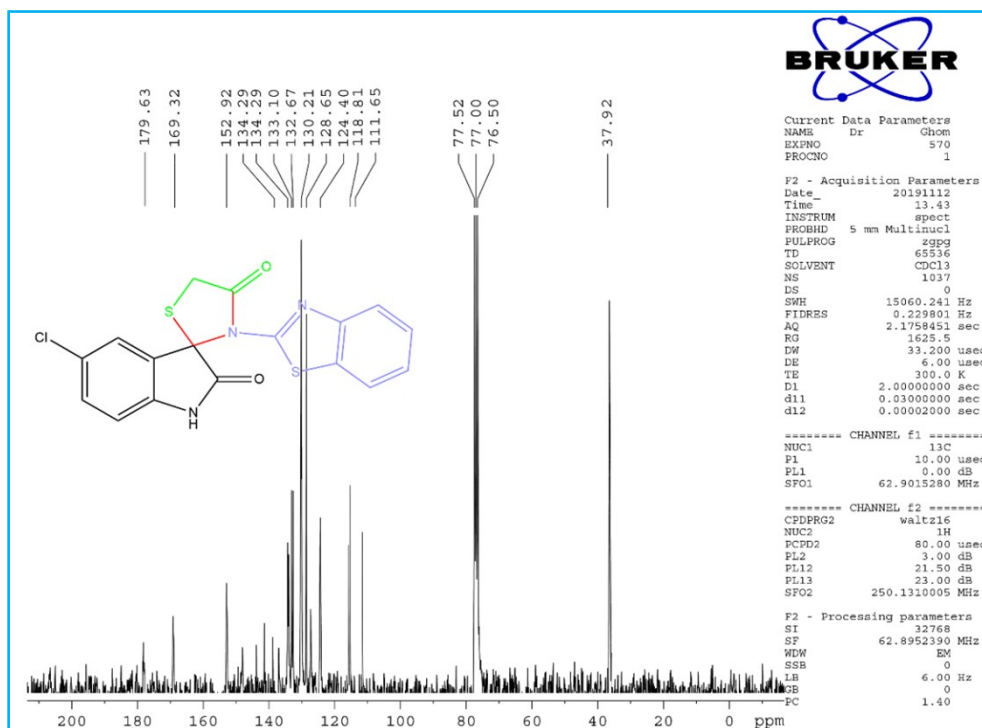

**Figure S55:**  $^{13}\text{C}$  NMR spectrum of 5-Chloro-3'-(1,3-benzothiazol-2-yl)-spiro-[3H-indole-3,2'thiazolidine]-2,4'(1H)-dione (**4x**)



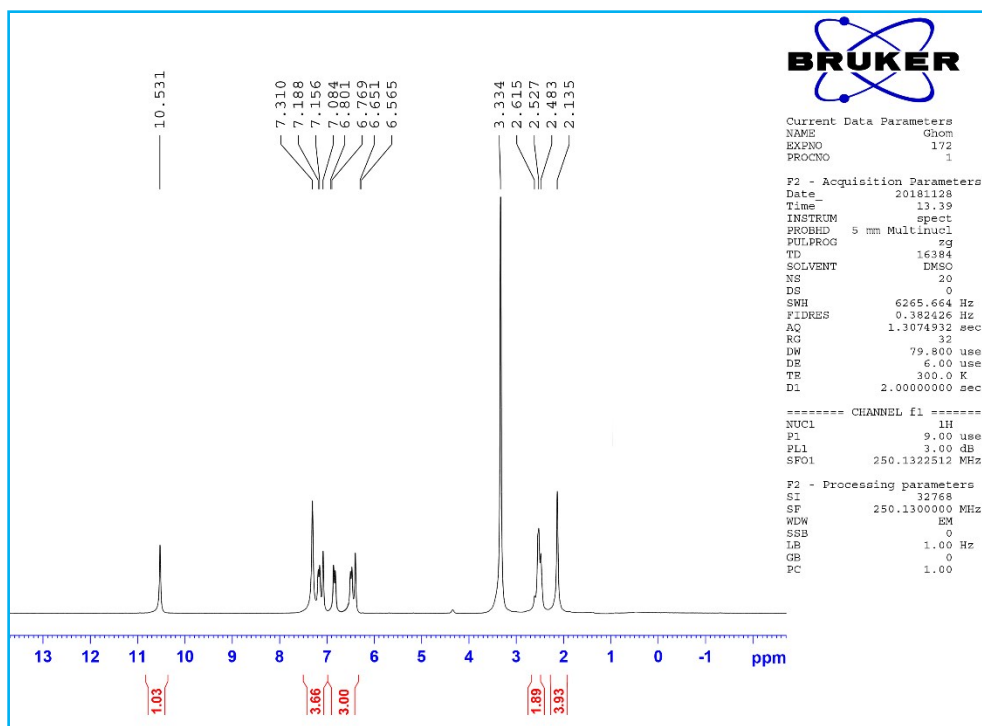

**Figure S56:**  $^1\text{H}$  NMR spectrum of 5-Methyl-3'-(1,3-benzothiazol-2-yl)-spiro-[3H-indole3,2'-thiazolidine]-2,4'(1H)-dione (**4y**)

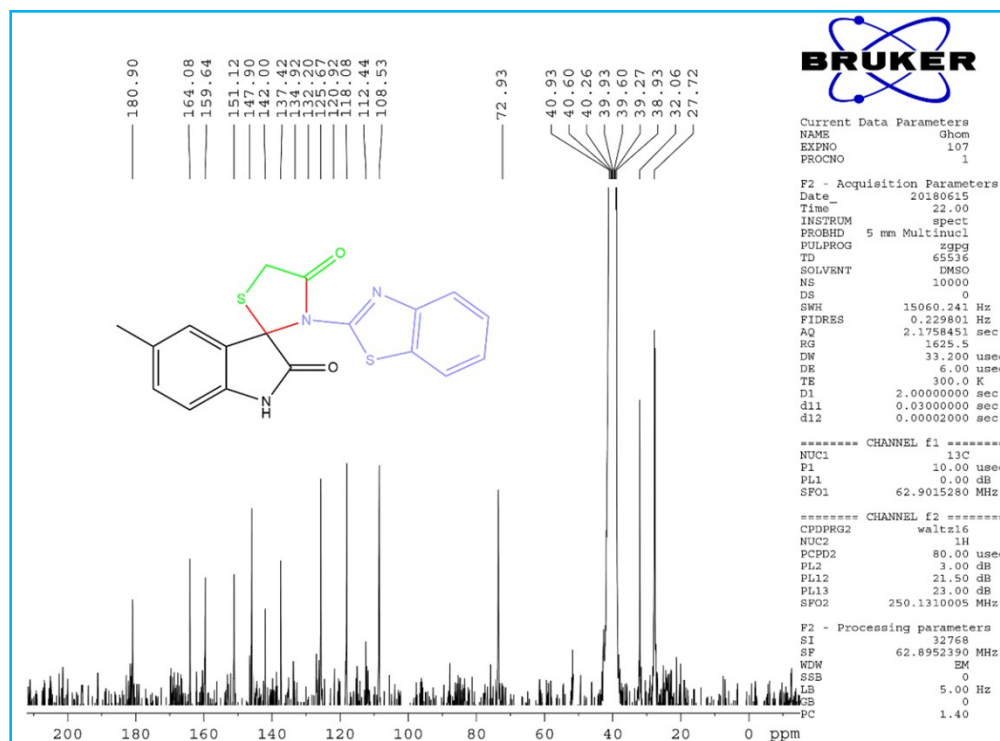

**Figure S57:**  $^{13}\text{C}$  NMR spectrum of 5-Methyl-3'-(1,3-benzothiazol-2-yl)-spiro-[3H-indole3,2'-thiazolidine]-2,4'(1H)-dione (**4y**)

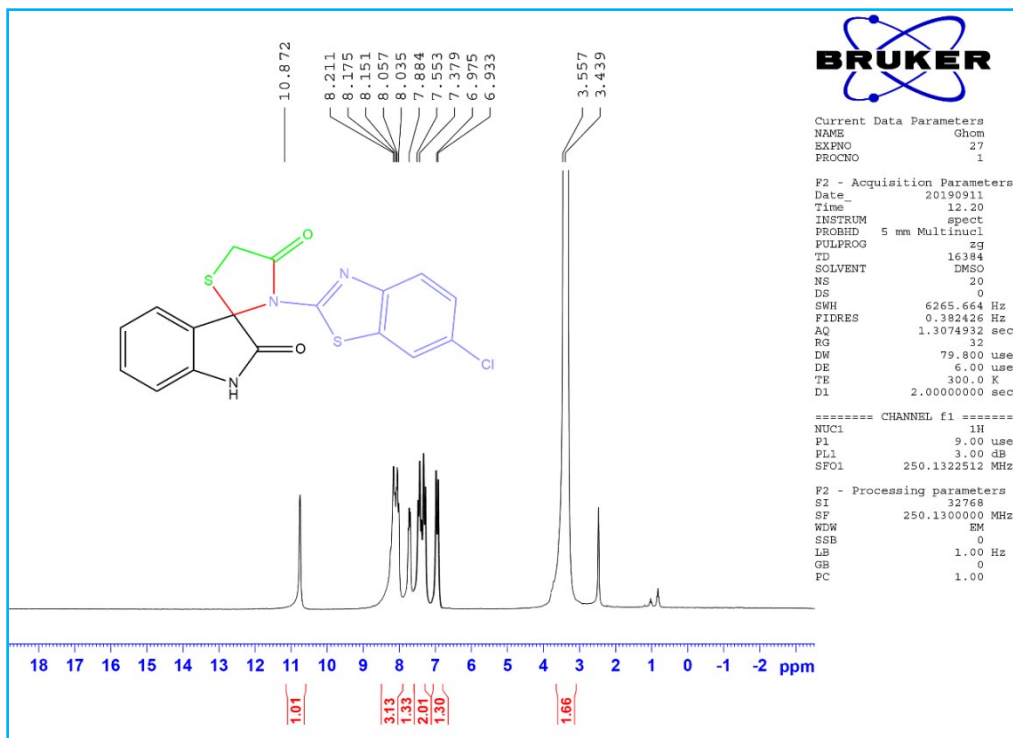

**Figure S58:**  $^1\text{H}$  NMR spectrum of 3'-(6-chloro-1,3-benzothiazol-2-yl)-spiro-[3H-indole3,2'-thiazolidine]-2,4'(1H)-dione (**4z**)

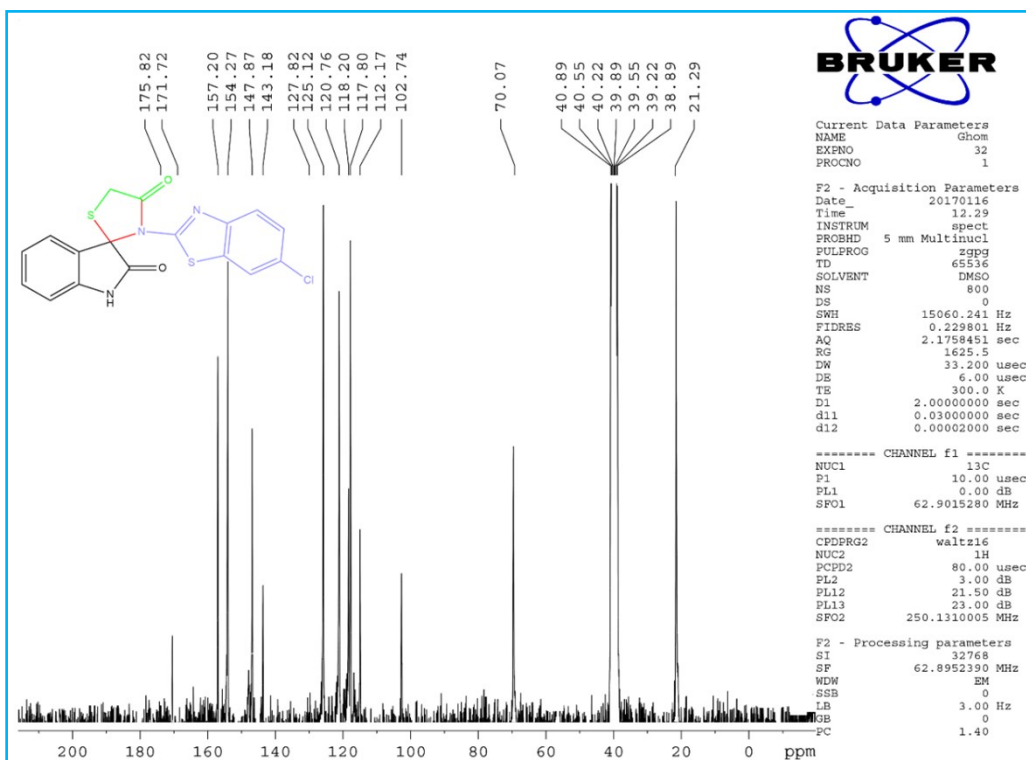

**Figure S59:**  $^{13}\text{C}$  NMR spectrum of 3'-(6-chloro-1,3-benzothiazol-2-yl)-spiro-[3H-indole3,2'-thiazolidine]-2,4'(1H)-dione (**4z**)
